# Supplementary material for: The integrity of dopaminergic and noradrenergic brain regions is associated with different aspects of late-life memory performance
Source: Springer Nature journal article supplement (doi:10.1038/s43587-023-00469-z), 2023-08-31
Supplement: MOESM1 [file 43587_2023_469_MOESM1_ESM.pdf]

# **The integrity of dopaminergic and noradrenergic brain regions is associated with different aspects of late-life memory performance**

---

In the format provided by the authors and unedited

|    |                                                                                                                |    |
|----|----------------------------------------------------------------------------------------------------------------|----|
| 1  | <b>Supplementary information:</b>                                                                              |    |
| 2  | <b>Supplementary methods</b> .....                                                                             | 2  |
| 3  | Sampling in the Berlin Aging Study-II.....                                                                     | 2  |
| 4  | <b>Figure S1.</b> Flowchart depicting the participant selection for each time point and age group. ....        | 3  |
| 5  | <b>Table S1.</b> Overview of participants with available imaging data.....                                     | 4  |
| 6  | <b>Table S2.</b> Overview of magnetic resonance imaging sequences.....                                         | 5  |
| 7  | <b>Figure S2.</b> Overview of MRI template generation.....                                                     | 6  |
| 8  | <b>Supplementary results</b> .....                                                                             | 7  |
| 9  | <b>Table S3.</b> Overview of model paths evaluated using likelihood ratio tests .....                          | 7  |
| 10 | Cross-sectional neural models:.....                                                                            | 11 |
| 11 | <b>Table S4.</b> Model fit and invariance for cross-sectional neural models .....                              | 11 |
| 12 | <b>Figure S3.</b> Model 1.1.1.....                                                                             | 12 |
| 13 | <b>Figure S4.</b> Model 1.1.2.....                                                                             | 13 |
| 14 | <b>Figure S5.</b> Model 1.1.3.....                                                                             | 14 |
| 15 | <b>Figure S6.</b> Cross-sectional age differences in modality-specific LC factors .....                        | 15 |
| 16 | <b>Figure S7.</b> Cross-sectional age differences in modality-specific SN–VTA factors.....                     | 16 |
| 17 | <b>Figure S8.</b> LC and SN–VTA intensities are correlated across imaging modalities (in older adults).....    | 17 |
| 18 | Cross-sectional cognitive models:.....                                                                         | 18 |
| 19 | <b>Table S5.</b> Model fit and invariance for cross-sectional cognitive models .....                           | 18 |
| 20 | <b>Figure S9.</b> Model 1.2.1.....                                                                             | 19 |
| 21 | Cross-sectional neuro–cognitive models:.....                                                                   | 20 |
| 22 | <b>Table S6.</b> Model fit and invariance for cross-sectional neuro–cognitive models.....                      | 20 |
| 23 | <b>Figure S10. Model 1.3.1. (a)</b> .....                                                                      | 21 |
| 24 | <b>Figure S11. Model 1.3.1. (b)</b> .....                                                                      | 22 |
| 25 | <b>Figure S12. Model 1.3.2. (a)</b> .....                                                                      | 23 |
| 26 | <b>Figure S13. Model 1.3.2. (b)</b> .....                                                                      | 24 |
| 27 | Cross-sectional neuro–cognitive model with mean intensity ratios.....                                          | 25 |
| 28 | <b>Table S7.</b> Comparison of parameter estimates of cross-sectional neuro–cognitive models fit with peak and |    |
| 29 | mean intensity ratio data.....                                                                                 | 25 |
| 30 | Longitudinal neural models:.....                                                                               | 26 |
| 31 | <b>Table S8.</b> Model fit and invariance for longitudinal neural models.....                                  | 26 |
| 32 | <b>Figure S14.</b> Model 2.1.1.....                                                                            | 27 |
| 33 | <b>Figure S15.</b> Model 2.1.2.....                                                                            | 28 |
| 34 | <b>Figure S16.</b> Model 2.1.3.....                                                                            | 29 |

|    |                                                                                                                        |    |
|----|------------------------------------------------------------------------------------------------------------------------|----|
| 35 | <b>Figure S17.</b> Model 2.1.4.....                                                                                    | 30 |
| 36 | <b>Figure S18.</b> Model 2.1.5.....                                                                                    | 31 |
| 37 | <b>Figure S19.</b> Model 2.1.6.....                                                                                    | 32 |
| 38 | <b>Figure S20.</b> SN–VTA intensities are correlated across imaging modalities.....                                    | 33 |
| 39 | <b>Figure S21.</b> Model 2.1.7.....                                                                                    | 35 |
| 40 | <b>Figure S22.</b> Model 2.1.8.....                                                                                    | 36 |
| 41 | <b>Figure S23.</b> Pontine reference intensities across imaging modalities and time points, and their association with |    |
| 42 | chronological age (in older adults).....                                                                               | 37 |
| 43 | <b>Figure S24.</b> Crus cerebri reference intensities across imaging modalities and time points, and their association |    |
| 44 | with chronological age (in older adults).....                                                                          | 38 |
| 45 | Longitudinal cognitive models:.....                                                                                    | 39 |
| 46 | <b>Table S9.</b> Model fit and invariance for longitudinal cognitive models.....                                       | 39 |
| 47 | <b>Figure S25.</b> Model 2.2.1.....                                                                                    | 40 |
| 48 | <b>Figure S26.</b> Model 2.2.2.....                                                                                    | 41 |
| 49 | <b>Figure S27.</b> Older adults’ working memory performance for time points 1–3 for each indicator task.....           | 42 |
| 50 | <b>Figure S28.</b> Older adults’ episodic memory performance for time points 1–3 for each indicator task.....          | 42 |
| 51 | Longitudinal neuro–cognitive models:.....                                                                              | 43 |
| 52 | <b>Table S10.</b> Model fit and invariance for longitudinal neuro–cognitive models.....                                | 43 |
| 53 | <b>Figure S29.</b> Model 2.3.1.....                                                                                    | 44 |
| 54 | <b>Figure S30.</b> Model 2.3.2.....                                                                                    | 45 |
| 55 | <b>Figure S31.</b> Longitudinal changes in SN–VTA intensity ratios and their association with age and future           |    |
| 56 | memory performance.....                                                                                                | 47 |
| 57 | Cross-sectional and longitudinal neuro–cognitive models with additional covariates:.....                               | 48 |
| 58 | <b>Table S11.</b> Model fit and invariance for neuro–cognitive models with additional covariates.....                  | 48 |
| 59 | Spatial variation in longitudinal sampling of LC and SN–VTA intensity.....                                             | 50 |
| 60 | <b>Figure S32.</b> Euclidian distance of spatial positions from which intensity ratios were sampled at time point 1    |    |
| 61 | and 2.....                                                                                                             | 51 |
| 62 | <b>Supplementary references:</b> .....                                                                                 | 52 |
| 63 |                                                                                                                        |    |
| 64 |                                                                                                                        |    |

## 65 **Supplementary methods**

### 66 **Sampling in the Berlin Aging Study-II**

67 The Berlin Aging Study-II (BASE-II) is a study of healthy aging—participants were cognitively unimpaired at  
68 baseline. Younger (20–35 years of age) and older participants (60–80 years of age) were enrolled at time point 1 and  
69 no new participants were entered afterwards. The study design and sampling are described in several recent  
70 publications [1–4]. The following description of the sampling procedure represents a verbatim quote from [2]:  
71

72 *Only residents of the greater metropolitan area of Berlin, Germany, were eligible for participation in BASE-II.*  
73 *Potential participants were drawn from a pool of individuals originally recruited at the Max-Planck-Institute for*  
74 *Human Development as part of a number of earlier projects with a focus on neurocognition.*  
75 *Briefly, participant recruitment for these and other studies was based on advertisements in local newspapers and*  
76 *the public commuter transport system. This led to approximately 10 000 responders of whom 2875 were invited for*  
77 *an additional screening (either in-house or by telephone), leading to 2262 individuals eligible for inclusion in*  
78 *BASE-II, i.e. 79% of those who were initially invited. From these, we selected 2200 individuals to represent the*  
79 *BASE-II baseline cohort based on their age and sex as follows. A total of 1600 participants were assigned to an*  
80 *older subgroup aged between 60 and 80 years, whereas the remaining 600 individuals were assigned to a younger*  
81 *subgroup (serving as a reference population) aged between 20 and 35 years. By design, each age subgroup contains*  
82 *equal numbers of males and females. Some ageing-related changes, such as decline in perceptual speed, begin in*  
83 *early adulthood. At the same time, recent longitudinal studies indicate that average performance on other cognitive*  
84 *abilities, such as episodic memory, is relatively stable until about 60 years of age, and starts declining thereafter.*  
85 *Hence, we decided to start observing older adults at an age where most would show subsequent decline on most*  
86 *variables of interest. Comparisons with representative survey data from Berlin and Germany, ascertained via the*  
87 *SOEP questionnaire (see below), reveal that BASE-II participants are characterized by higher education and better*  
88 *self-reported health status than the general population of Berlin and Germany. In addition, BASE-II participants in*  
89 *the older subgroup report a significantly higher divorce/separation rate than participants in the age-matched*  
90 *reference populations. For convenience samples such as BASE-II this is a commonly observed phenomenon.*  
91

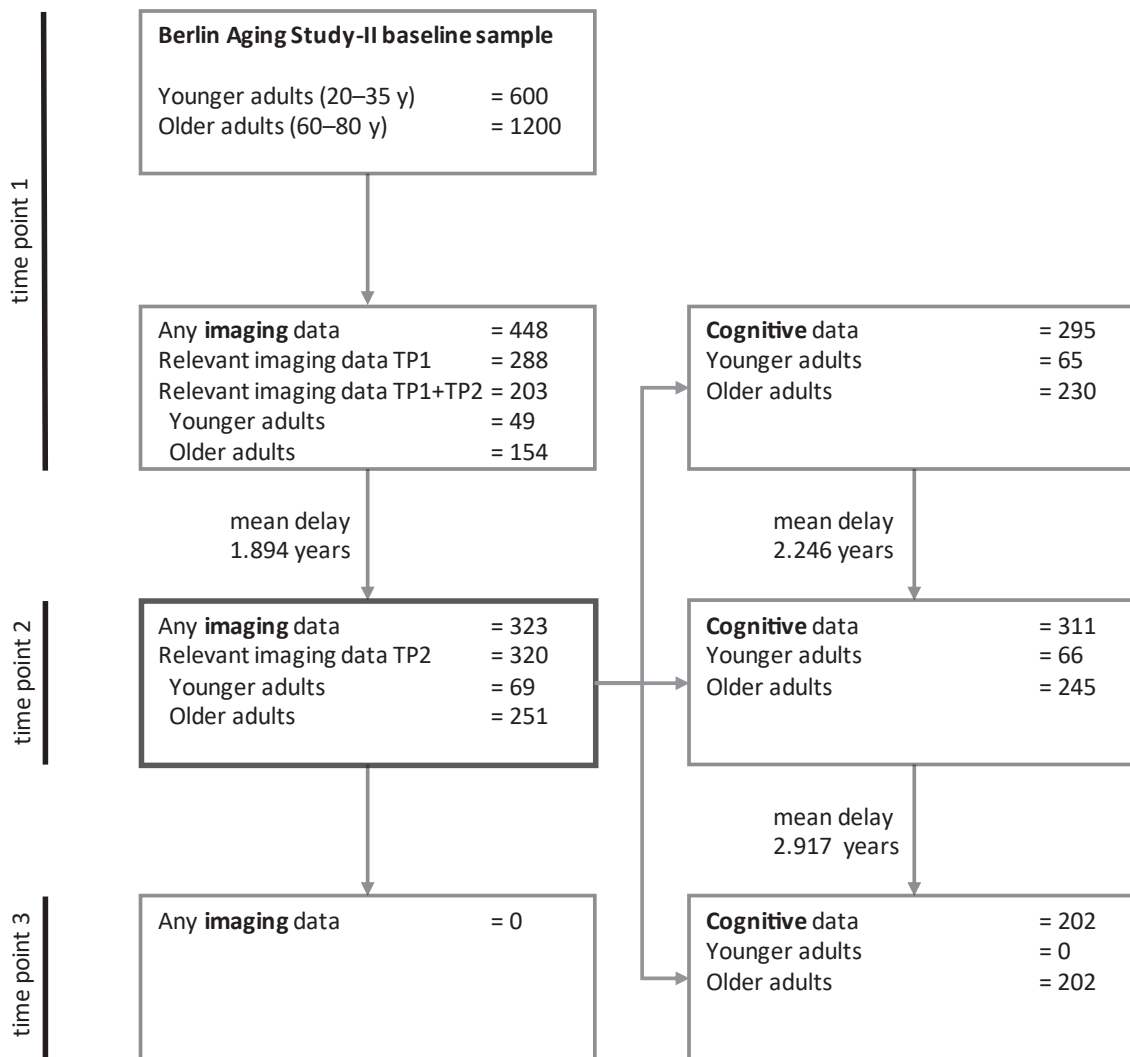

92

93 **Figure S1.** Flowchart depicting the participant selection for each time point and age group.

94 For general information on the eligibility criteria and recruitment procedure, see [2]. Note that analyses started with  
 95 cross-sectional data (within time point 2; dark grey box) and were followed up by longitudinal analyses (brain  
 96 changes from time point 1 to 2). Thus, all statistical models were restricted to the n = 320 participants with relevant  
 97 imaging data at time point 2.  
 98

99 **Table S1.** Overview of participants with available imaging data

| Magnetic resonance imaging sequence                                                          | Time period | Number of participants with relevant imaging data | Total number of participants with imaging data |
|----------------------------------------------------------------------------------------------|-------------|---------------------------------------------------|------------------------------------------------|
| Magnetization Transfer (MT+) <i>and</i> Proton Density (MT-)                                 | 1           | 288                                               | 448                                            |
| Magnetization Transfer (MT+) <i>and</i> Proton Density (MT-)                                 | 2           | 260                                               | 323                                            |
| Fast Spin Echo (FSE)                                                                         | 1           | 0                                                 | 448                                            |
| Fast Spin Echo (FSE)                                                                         | 2           | 316                                               | 323                                            |
| Fast Spin Echo (FSE) <i>and</i> Magnetization Transfer (MT+) <i>and</i> Proton Density (MT-) | 1           | 0                                                 | 448                                            |
| Fast Spin Echo (FSE) <i>or</i> Magnetization Transfer (MT+) <i>and</i> Proton Density (MT-)  | 1           | 288                                               | 448                                            |
| Fast Spin Echo (FSE) <i>and</i> Magnetization Transfer (MT+) <i>and</i> Proton Density (MT-) | 2           | 256                                               | 323                                            |
| Fast Spin Echo (FSE) <i>or</i> Magnetization Transfer (MT+) <i>and</i> Proton Density (MT-)  | 2           | 320                                               | 323                                            |

100 *Note:* Relevant imaging data refers to participants with a whole-brain T<sub>1</sub>-weighted (MPRAGE) sequence  
 101 as well as a sequence sensitive for dopaminergic or noradrenergic neuromodulatory centers  
 102 (Magnetization Transfer (MT+), Proton Density (MT-) or Fast Spin Echo (FSE)). By contrast, the total  
 103 number of participants with imaging data reflects all participants that underwent MRI, irrespective of  
 104 sequence type. The Magnetization Transfer and Proton Density sequences were acquired in succession in  
 105 each scan session (i.e., identical sequence, acquired once with and one without dedicated MT preparation  
 106 pulse). Thus, they are grouped in the table.  
 107

108 **Table S2.** Overview of magnetic resonance imaging sequences

| Magnetic resonance imaging sequence                        | Acquisition matrix; Slices (orientation; distance factor) | Voxel size (x, y, z; mm) | Repetition time (TR; ms) | Echo time (TE; ms) | Flip angle (°) |
|------------------------------------------------------------|-----------------------------------------------------------|--------------------------|--------------------------|--------------------|----------------|
| Magnetization Transfer (MT+) <sup>1</sup>                  | 192 × 256 × 48 (axial; -)                                 | 1 × 1 × 3                | 38                       | 5.5                | 10             |
| Proton Density (MT-) <sup>2</sup>                          | 192 × 256 × 48 (axial; -)                                 | 1 × 1 × 3                | 38                       | 5.5                | 10             |
| Fast Spin Echo (FSE) <sup>3</sup>                          | 440 × 512 10 (axial; 20 %)                                | 0.5 × 0.5 × 2.5          | 600                      | 11                 | 120            |
| Magnetization Prepared Gradient-Echo (MPRAGE) <sup>4</sup> | 256 × 256 × 192 (sagittal; -)                             | 1 × 1 × 1                | 2500                     | 4.77               | 7              |

109 *Note:* All sequences were acquired with a standard 32-channel head coil.

110 <sup>1:</sup> Magnetization Transfer Contrast (MTC) option enabled (MT pulse: 1200 Hz off-resonance, 16 ms [110]); 3-D  
 111 sequence

112 <sup>2:</sup> Magnetization Transfer Contrast (MTC) option disabled; 3-D sequence

113 <sup>3:</sup> Each FSE acquisition included four online averages and yielded two brainstem images. The values extracted from  
 114 these images were aggregated offline. SAR limits resulted in a slight variation in the number of slices [88];  
 115 2-D sequence; sometimes also called Turbo Spin Echo (TSE).

116 <sup>4:</sup> Inversion time (TI; ms): 1100; 3-D sequence

117

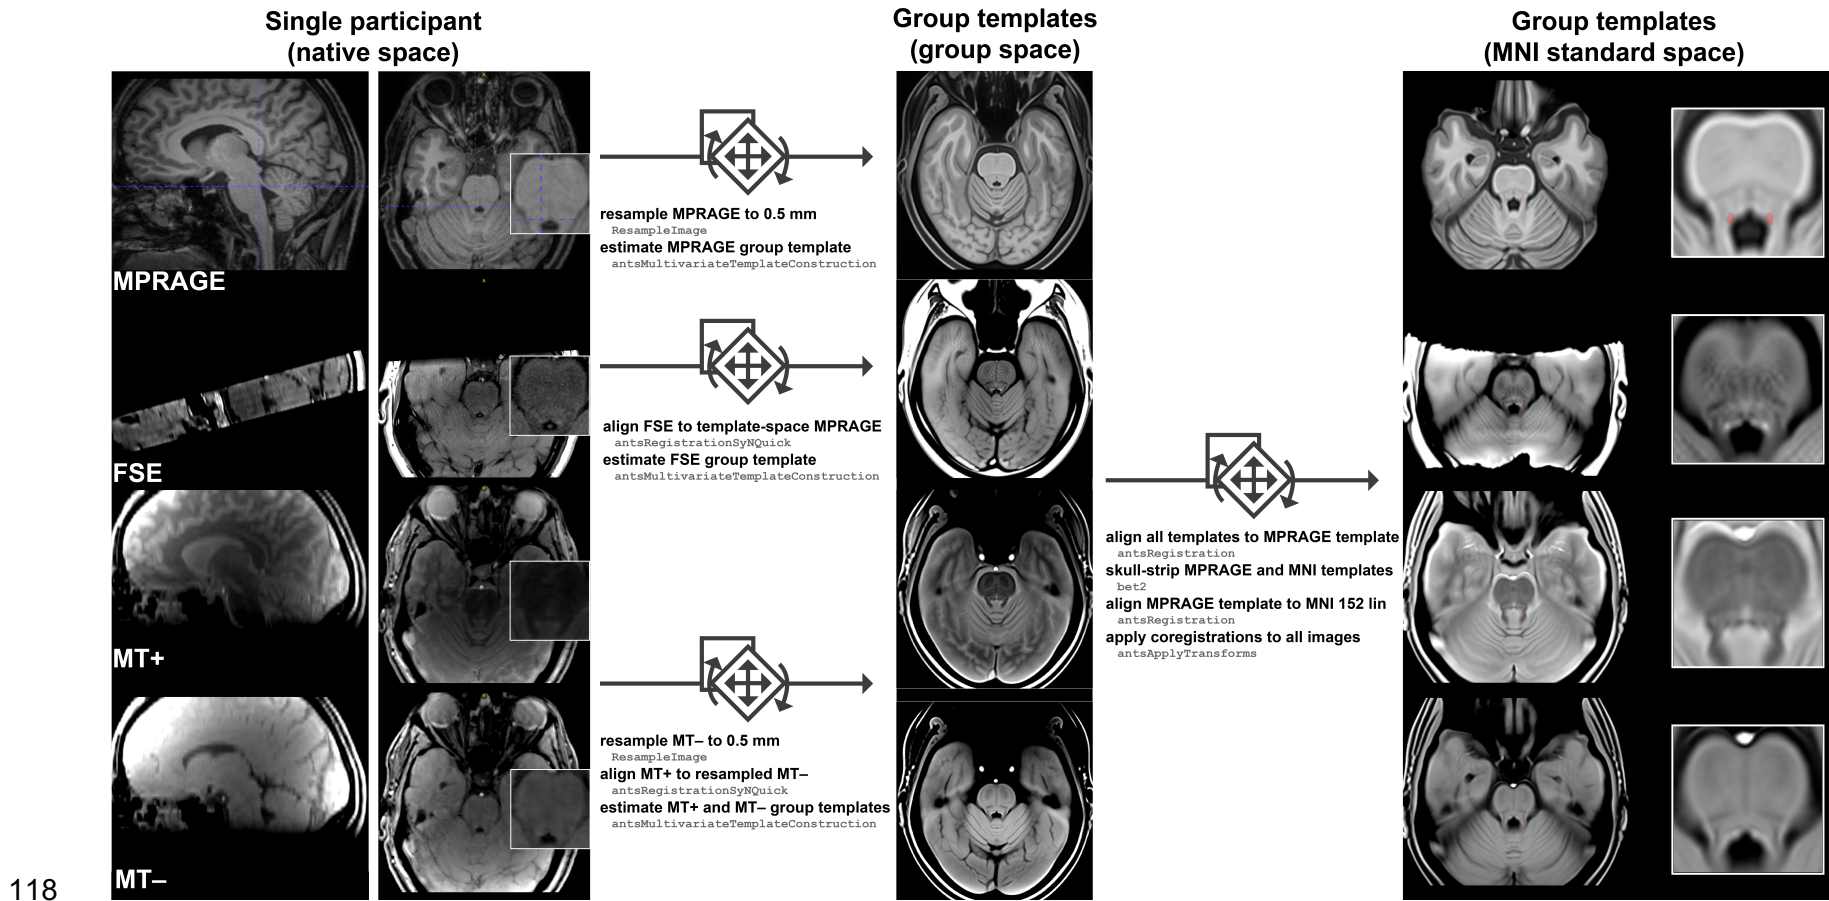

118

119 **Figure S2.** Overview of MRI template generation.

120 From left to right, images are transformed from native space via group template space to standard MNI 152 linear 0.5 mm space. The arrows indicate the  
 121 transformations across spaces. Grey font indicates the corresponding functions. LC-related hyperintensities are evident across modalities (except MPRAGE) in  
 122 single participant and group images. The blue crosshair marks the approximate location of the right locus coeruleus in native space. In standard space, the red  
 123 overlay indicates the locus coeruleus volume of interest [5]. FSE, Fast Spin Echo; MT+, Magnetization Transfer; MT-, Proton Density.



124 **Supplementary results**

125 **Table S3.** Overview of model paths evaluated using likelihood ratio tests

Result section:

**Locus coeruleus and substantia nigra–ventral tegmental area intensity shows high agreement across imaging modalities**

| Model  | Tested group(s)<br>(sample size)                                            | Tested path(s)                                  | Results                                                                                                                                                                            | Interpretation                                                                                   |
|--------|-----------------------------------------------------------------------------|-------------------------------------------------|------------------------------------------------------------------------------------------------------------------------------------------------------------------------------------|--------------------------------------------------------------------------------------------------|
| 1.1.1. | Multi-group model with YA, OA (n <sub>YA</sub> = 69; n <sub>OA</sub> = 251) | μLCfse'<br>μLCmt'<br>μLCnomt'                   | $\Delta\chi^2(df = 2) = 693.55;$<br>$p < 0.001$                                                                                                                                    | Mean locus coeruleus intensity differs across MRI sequences                                      |
| 1.1.1. | Multi-group model with YA, OA (n <sub>YA</sub> = 69; n <sub>OA</sub> = 251) | μSNmt'<br>μSNnomt'                              | $\Delta\chi^2(df = 1) = 657.37;$<br>$p < 0.001$                                                                                                                                    | Mean substantia nigra–ventral tegmental area intensity differs across MRI sequences              |
| 1.1.1. | Multi-group model with YA, OA (n <sub>YA</sub> = 69; n <sub>OA</sub> = 251) | γLCfse_LCmt'<br>γLCfse_LCnomt'<br>γLCmt_LCnomt' | $r = 0.61; \Delta\chi^2(df = 1) = 43.95;$<br>$p < 0.001;$<br>$r = 0.43; \Delta\chi^2(df = 1) = 23.53;$<br>$p < 0.001;$<br>$r = 0.62; \Delta\chi^2(df = 1) = 52.71;$<br>$p < 0.001$ | Locus coeruleus intensity is correlated across MRI sequences (agreement)                         |
| 1.1.1. | Multi-group model with YA, OA (n <sub>YA</sub> = 69; n <sub>OA</sub> = 251) | γSNmt_SNnomt'                                   | $r = 0.503; \Delta\chi^2(df = 1) = 31.67; p < 0.001$                                                                                                                               | Substantia nigra–ventral tegmental area intensity is correlated across MRI sequences (agreement) |

Result section:

**Multimodal locus coeruleus and substantia nigra–ventral tegmental area integrity factors show high stability over time**

| Model  | Tested path(s)                                           | Results                                       | Interpretation                                                                                                       |                                                                                                              |
|--------|----------------------------------------------------------|-----------------------------------------------|----------------------------------------------------------------------------------------------------------------------|--------------------------------------------------------------------------------------------------------------|
| 2.1.1. | Single-group model with YA_OA (n <sub>YA-OA</sub> = 320) | γLCmt_TP1_LCmt_TP2;<br>γLCnomt_TP1_LCnomt_TP2 | $r = 0.6; \Delta\chi^2(df = 1) = 40.32;$<br>$p < 0.001;$<br>$r = 0.63; \Delta\chi^2(df = 1) = 52.57;$<br>$p < 0.001$ | Locus coeruleus intensity is correlated within MRI sequences across time (stability)                         |
| 2.1.5  | Single-group model with YA_OA (n <sub>YA-OA</sub> = 320) | γSNmt_TP1_SNmt_TP2;<br>γSNnomt_TP1_SNnomt_TP2 | $r = 0.66; \Delta\chi^2(df = 1) = 45.84$<br>$p < 0.001;$<br>$r = 0.18; \Delta\chi^2(df = 1) = 1.88;$<br>$p = 0.17;$  | Substantia nigra–ventral tegmental area intensity is correlated within MRI sequences across time (stability) |
| 2.1.2. | Single-group model with YA_OA (n <sub>YA-OA</sub> = 320) | γLC_TP1_LC_TP2                                | $r = 0.88; \Delta\chi^2(df = 1) = 66.93;$<br>$p < 0.001$                                                             | Multimodal locus coeruleus integrity is correlated across time (stability)                                   |

|       |                                                          |                             |                                                         |                                                                                                    |
|-------|----------------------------------------------------------|-----------------------------|---------------------------------------------------------|----------------------------------------------------------------------------------------------------|
| 2.1.6 | Single-group model with YA_OA (n <sub>YA-OA</sub> = 320) | $\gamma_{SN\_TP1\_SN\_TP2}$ | $r = 0.67; \Delta\chi^2(df = 1) = 47.71$<br>$p < 0.001$ | Multimodal substantia nigra–ventral tegmental area integrity is correlated across time (stability) |
|-------|----------------------------------------------------------|-----------------------------|---------------------------------------------------------|----------------------------------------------------------------------------------------------------|

Result section:

**Locus coeruleus and substantia nigra–ventral tegmental area are associated with different aspects of late-life memory performance**

|                |                                                                             |                                                                                                                                      |                                                                                                                                                            |                                                                                                                                                                                                                    |
|----------------|-----------------------------------------------------------------------------|--------------------------------------------------------------------------------------------------------------------------------------|------------------------------------------------------------------------------------------------------------------------------------------------------------|--------------------------------------------------------------------------------------------------------------------------------------------------------------------------------------------------------------------|
| 1.2.1          | Multi-group model with YA, OA (n <sub>YA</sub> = 69; n <sub>OA</sub> = 251) | $\mu_{WM}$ ;<br>$\mu_{EM}$ ;<br>$\mu_{Gf}$                                                                                           | $\Delta\chi^2(df = 1) = 100.63$ ;<br>$p < 0.001$ ;<br>$\Delta\chi^2(df = 1) = 102.52$ ;<br>$p < 0.001$ ;<br>$\Delta\chi^2(df = 1) = 89.4$ ;<br>$p < 0.001$ | Working memory, episodic memory, and fluid intelligence performance is lower in older adults compared to younger adults                                                                                            |
| 1.3.1. (covar) | Multi-group model with YA, OA (n <sub>YA</sub> = 69; n <sub>OA</sub> = 251) | $\gamma_{LC\_WM}$ ;<br>$\gamma_{LC\_EM}$ ;<br>$\gamma_{LC\_Gf}$                                                                      | $\Delta\chi^2(df = 3) = 25.11$ ;<br>$p < 0.001$                                                                                                            | Multimodal locus coeruleus integrity is associated with late-life cognition                                                                                                                                        |
| 1.3.1. (covar) | Multi-group model with YA, OA (n <sub>YA</sub> = 69; n <sub>OA</sub> = 251) | $\gamma_{SN\_WM}$ ;<br>$\gamma_{SN\_EM}$ ;<br>$\gamma_{SN\_Gf}$                                                                      | $\Delta\chi^2(df = 3) = 7.86$ ;<br>$p = 0.049$                                                                                                             | Multimodal substantia nigra–ventral tegmental area integrity is associated with late-life cognition                                                                                                                |
| 1.3.1. (covar) | Multi-group model with YA, OA (n <sub>YA</sub> = 69; n <sub>OA</sub> = 251) | $\gamma_{LC\_SN}$                                                                                                                    | $r = 0.25; \Delta\chi^2(df = 1) = 5.75$ ;<br>$p = 0.017$                                                                                                   | Multimodal locus coeruleus and substantia nigra–ventral tegmental area integrity are correlated in older adults                                                                                                    |
| 1.3.1. (covar) | Multi-group model with YA, OA (n <sub>YA</sub> = 69; n <sub>OA</sub> = 251) | $\gamma_{LC\_WM}$ ;<br>$\gamma_{LC\_EM}$ ;<br>$\gamma_{LC\_Gf}$ ;<br>$\gamma_{SN\_WM}$ ;<br>$\gamma_{SN\_EM}$ ;<br>$\gamma_{SN\_Gf}$ | $\Delta\chi^2(df = 3) = 15.66$ ;<br>$p = 0.001$                                                                                                            | Multimodal locus coeruleus and substantia nigra–ventral tegmental area integrity are differentially associated with late-life cognition                                                                            |
| 1.3.1. (covar) | Multi-group model with YA, OA (n <sub>YA</sub> = 69; n <sub>OA</sub> = 251) | $\gamma_{LC\_EM}$                                                                                                                    | $r = 0.49; \Delta\chi^2(df = 1) = 21.44$ ;<br>$p < 0.001$                                                                                                  | Multimodal locus coeruleus integrity is associated with late-life episodic memory                                                                                                                                  |
| 1.3.1. (covar) | Multi-group model with YA, OA (n <sub>YA</sub> = 69; n <sub>OA</sub> = 251) | $\gamma_{LC\_EM}$ ;<br>$\gamma_{LC\_WM}$ ;<br>$\gamma_{LC\_Gf}$ ;                                                                    | $\Delta\chi^2(df = 2) = 10.64$ ;<br>$p = 0.005$                                                                                                            | The association of multimodal locus coeruleus integrity with late-life episodic memory differs from the associations with working memory and fluid intelligence                                                    |
| 1.3.1. (covar) | Multi-group model with YA, OA (n <sub>YA</sub> = 69; n <sub>OA</sub> = 251) | $\gamma_{LC\_EM}$ ;<br>$\gamma_{SN\_EM}$ ;                                                                                           | $\Delta\chi^2(df = 1) = 6.63$ ;<br>$p = 0.01$                                                                                                              | The association of multimodal locus coeruleus integrity with late-life episodic memory differs from the association of multimodal substantia nigra–ventral tegmental area integrity with late-life episodic memory |
| 1.3.1. (covar) | Multi-group model with YA, OA                                               | $\gamma_{SN\_WM}$                                                                                                                    | $r = 0.28; \Delta\chi^2(df = 1) = 6.76$ ;<br>$p = 0.009$                                                                                                   | Multimodal substantia nigra–ventral tegmental area integrity is associated with late-life working memory                                                                                                           |

|                |                                                                     |                                                                      |                                                                 |                                                                                                                                                                                                                  |
|----------------|---------------------------------------------------------------------|----------------------------------------------------------------------|-----------------------------------------------------------------|------------------------------------------------------------------------------------------------------------------------------------------------------------------------------------------------------------------|
|                | ( $n_{YA} = 69$ ; $n_{OA} = 251$ )                                  |                                                                      |                                                                 |                                                                                                                                                                                                                  |
| 1.3.1. (covar) | Multi-group model with YA, OA<br>( $n_{YA} = 69$ ; $n_{OA} = 251$ ) | $\gamma_{SN\_WM'}$ ;<br>$\gamma_{SN\_EM'}$ ;<br>$\gamma_{SN\_Gf'}$ ; | $\Delta\chi^2(df = 2) = 5.73$ ;<br>$p = 0.057$                  | The association of multimodal substantia nigra–ventral tegmental area integrity with late-life working memory differs (on a trend level) from the associations with episodic memory and fluid intelligence       |
| 1.3.1. (covar) | Multi-group model with YA, OA<br>( $n_{YA} = 69$ ; $n_{OA} = 251$ ) | $\gamma_{SN\_WM'}$ ;<br>$\gamma_{LC\_WM'}$ ;                         | $\Delta\chi^2(df = 1) = 2.01$ ;<br>$p = 0.156$                  | The association of multimodal substantia nigra–ventral tegmental area integrity with late-life working memory differs from the association of multimodal locus coeruleus integrity with late-life working memory |
| 1.3.1. (reg)   | Multi-group model with YA, OA<br>( $n_{YA} = 69$ ; $n_{OA} = 251$ ) | $\gamma_{LC\_EM'}$                                                   | $\beta = 0.5$ ; $\Delta\chi^2(df = 1) = 19.55$ ;<br>$p < 0.001$ | Multimodal locus coeruleus integrity is associated with late-life episodic memory, even when accounting for substantia nigra–ventral tegmental area integrity                                                    |
| 1.3.1. (reg)   | Multi-group model with YA, OA<br>( $n_{YA} = 69$ ; $n_{OA} = 251$ ) | $\gamma_{SN\_WM'}$                                                   | $\beta = 0.28$ ; $\Delta\chi^2(df = 1) = 6.05$ ;<br>$p = 0.014$ | Multimodal substantia nigra–ventral tegmental area integrity is associated with late-life working memory, even when accounting for locus coeruleus integrity                                                     |

Result section:

**Locus coeruleus and substantia nigra–ventral tegmental area are associated with memory performance over and above medial temporal lobe volumes**

|                |                                                  |                    |                                                                  |                                                                                                                                                                                                          |
|----------------|--------------------------------------------------|--------------------|------------------------------------------------------------------|----------------------------------------------------------------------------------------------------------------------------------------------------------------------------------------------------------|
| 1.3.2. (covar) | Single-group model with OA<br>( $n_{OA} = 251$ ) | $\gamma_{LC\_MTL}$ | $r = 0.41$ ; $\Delta\chi^2(df = 1) = 27.45$ ;<br>$p < 0.001$     | Multimodal locus coeruleus integrity is associated with medial temporal lobe volume                                                                                                                      |
| 1.3.2. (covar) | Single-group model with OA<br>( $n_{OA} = 251$ ) | $\gamma_{SN\_MTL}$ | $r = 0.23$ ; $\Delta\chi^2(df = 1) = 6.29$ ;<br>$p = 0.012$      | Multimodal substantia nigra–ventral tegmental area integrity is associated with medial temporal lobe volume                                                                                              |
| 1.3.2. (covar) | Single-group model with OA<br>( $n_{OA} = 251$ ) | $\gamma_{MTL\_EM}$ | $r = 0.33$ ; $\Delta\chi^2(df = 1) = 14.22$ ;<br>$p < 0.001$     | Medial temporal lobe volume is associated with late-life episodic memory                                                                                                                                 |
| 1.3.2. (reg)   | Single-group model with OA<br>( $n_{OA} = 251$ ) | $\gamma_{LC\_EM}$  | $\beta = 0.43$ ; $\Delta\chi^2(df = 1) = 11.96$ ;<br>$p < 0.001$ | Multimodal locus coeruleus integrity is associated with late-life episodic memory, even when accounting for medial temporal lobe volume and multimodal substantia nigra–ventral tegmental area integrity |
| 1.3.2. (reg)   | Single-group model with OA<br>( $n_{OA} = 251$ ) | $\gamma_{MTL\_EM}$ | $\beta = 0.16$ ; $\Delta\chi^2(df = 1) = 2.46$ ;<br>$p = 0.117$  | Medial temporal lobe volume is associated with late-life episodic memory, when accounting for the integrity of catecholaminergic nuclei                                                                  |
| 1.3.2. (reg)   | Single-group model with OA<br>( $n_{OA} = 251$ ) | $\gamma_{SN\_WM}$  | $\beta = 0.28$ ; $\Delta\chi^2(df = 1) = 5.8$ ;<br>$p = 0.016$   | Multimodal substantia nigra–ventral tegmental area integrity is associated with late-life working memory, even when accounting for medial temporal lobe volume and multimodal locus coeruleus integrity  |

Result section:

**Longitudinal changes in locus coeruleus integrity predict future episodic memory performance**

|        |                                                    |                                  |                                                         |                                                                                                                                       |
|--------|----------------------------------------------------|----------------------------------|---------------------------------------------------------|---------------------------------------------------------------------------------------------------------------------------------------|
| 2.1.3. | Single-group model with OA (n <sub>OA</sub> = 251) | $\gamma$ LCmt_slope_LCnomt_slope | $r = 0.16; \Delta\chi^2(df = 1) = 6.09; p = 0.014$      | Late-life changes in locus coeruleus intensity are correlated across MRI sequences                                                    |
| 2.1.7. | Single-group model with OA (n <sub>OA</sub> = 251) | $\gamma$ SNmt_slope_SNnomt_slope | $r = 0.13; \Delta\chi^2(df = 1) = 5.91; p = 0.015$      | Late-life changes in substantia nigra–ventral tegmental area intensity are correlated across MRI sequences                            |
| 2.1.4. | Single-group model with OA (n <sub>OA</sub> = 251) | $\sigma$ LC_slope                | $\Delta\chi^2(df = 1) = 6.09; p = 0.014$                | There are reliable individual differences in multimodal locus coeruleus integrity change                                              |
| 2.1.8. | Single-group model with OA (n <sub>OA</sub> = 251) | $\sigma$ SN_slope                | $\Delta\chi^2(df = 1) = 5.91; p = 0.015$                | There are reliable individual differences in multimodal substantia nigra–ventral tegmental area integrity change                      |
| 2.3.1. | Single-group model with OA (n <sub>OA</sub> = 251) | $\gamma$ Age_TP2_LC_slope        | $\beta = -0.18; \Delta\chi^2(df = 1) = 4.81; p = 0.028$ | Chronological age is associated with change in multimodal locus coeruleus integrity                                                   |
| 2.3.2. | Single-group model with OA (n <sub>OA</sub> = 251) | $\gamma$ Age_TP2_SN_slope        | $\beta = -0.29; \Delta\chi^2(df = 1) = 3.95; p = 0.047$ | Chronological age is associated with change in multimodal substantia nigra–ventral tegmental area integrity                           |
| 2.3.1. | Single-group model with OA (n <sub>OA</sub> = 251) | $\gamma$ LC_slope_EM_TP3         | $\beta = 0.23; \Delta\chi^2(df = 1) = 4.73; p = 0.03$   | Change in multimodal locus coeruleus integrity is associated with subsequent episodic memory                                          |
| 2.3.2. | Single-group model with OA (n <sub>OA</sub> = 251) | $\gamma$ SN_slope_WM_TP3         | $\beta = 0.27; \Delta\chi^2(df = 1) = 1.55; p = 0.213$  | Change in multimodal substantia nigra–ventral tegmental area integrity is not significantly associated with subsequent working memory |

126 **Note:**  $\mu$ , mean;  $\sigma$ , variance;  $\gamma$ , covariance or regression; Path names including “’” indicate a multi-group model with age group-specific parameter estimates; covar, covariance  
127 model; reg, multiple regression model; All structural equation models were estimated with full-information maximum likelihood estimation (that is, cases with partially missing  
128 data were not excluded [6]). Statistics are based on two-sided likelihood-ratio tests without additional adjustment for multiple comparisons.  
129

130 Cross-sectional neural models:

131 **Table S4.** Model fit and invariance for cross-sectional neural models

| Model number | Model name                              | Age group | Time point | Invariance                                      | $\chi^2$ | <i>df</i> | <i>p</i> | RMSEA              | CFI   |
|--------------|-----------------------------------------|-----------|------------|-------------------------------------------------|----------|-----------|----------|--------------------|-------|
| 1.1.1        | LC and SN–VTA modality-specific factors | YA, OA    | 2          | Strict (across age groups)                      | 111.131  | 82        | 0.018    | 0.047              | 0.963 |
| 1.1.2        | LC and SN–VTA multimodal factors        | YA, OA    | 2          | Partial strict <sup>1</sup> (across age groups) | 109.891  | 88        | 0.057    | 0.039              | 0.972 |
| 1.1.3        | MTL regional factors                    | OA        | 2          | – (single-group, cross-sectional model)         | 55.409   | 1         | < 0.001  | 0.467 <sup>2</sup> | 0.952 |

132 *Note:* LC, locus coeruleus; SN–VTA, substantia nigra–ventral tegmental area; MTL, medial temporal lobe; YA, younger adults; OA, older adults; YA, OA, multi-group model including both age groups; RMSEA, root mean square error of approximation; CFI, comparative fit index

135 <sup>1</sup>Partial strict invariance for model 1.1.2—the model did not show age-invariant intercepts of the modality-specific LC factors (test for strong invariance). We thus allowed for differences in  $\mu$ LCmt– across groups (i.e., partial invariance). Note that this does not influence our following analyses, which are based on covariances and regressions (not intercepts).

139 <sup>2</sup>Model 1.1.3 exceeds conventional recommendations for RMSEA. Note, however, that the unified neuro–cognitive model (1.3.2) on which we base our inferences shows good fit [7,8].

141 We provide  $\chi^2$  tests for assessing exact model fit and additional approximate fit indexes.

142

143

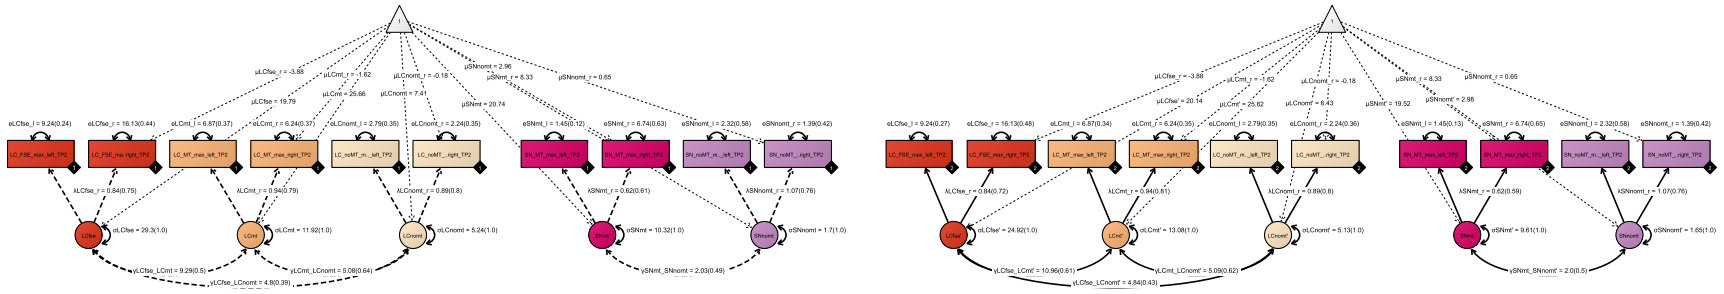

144

145 **Figure S3. Model 1.1.1.**

146 Pictorial rendition of a confirmatory factor analysis including modality-specific LC and SN-VTA factors for younger and older adults.

147 Rectangles and circles indicate manifest (observed) and latent variables, respectively. The constant is depicted by a triangle. Black diamonds on manifest

148 variables indicate the age group. The younger adult submodel is represented by dashed lines (◆1), and the older adults submodel is represented by solid lines

149 (◆2). (Co)Variances ( $\gamma$ ,  $\sigma$ ) and loadings ( $\lambda$ ) in brackets indicate standardized estimates. Parameters that have the same name are constrained to be equal across

150 age groups. One-headed arrows indicate regressions, double-headed arrows indicate correlations.

151 LC, locus coeruleus; SN, substantia nigra-ventral tegmental area; fse, Fast Spin Echo; mt, Magnetization Transfer (MT+)

152 nomt, Proton Density (MT-)

153

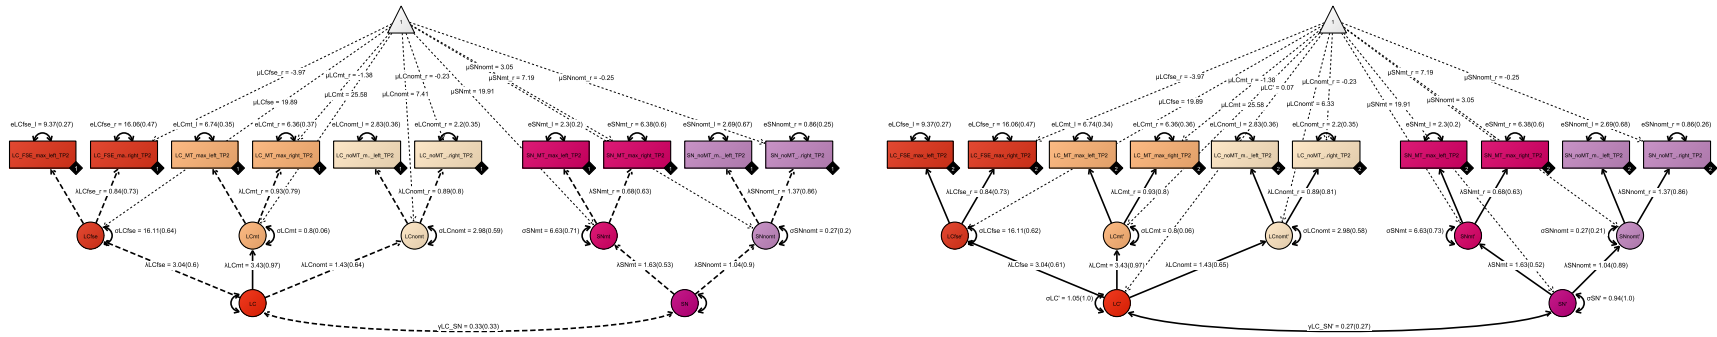

154

155 **Figure S4. Model 1.1.2.**

156 Pictorial rendition of a confirmatory factor analysis including multimodal LC and SN–VTA factors for younger and older adults.

157 Rectangles and circles indicate manifest (observed) and latent variables, respectively. The constant is depicted by a triangle. Black diamonds on manifest

158 variables indicate the age group. The younger adult submodel is represented by dashed lines (◆1), and the older adults submodel is represented by solid lines

159 (◆2). (Co)Variances ( $\gamma$ ,  $\sigma$ ) and loadings ( $\lambda$ ) in brackets indicate standardized estimates. Parameters that have the same name are constrained to be equal across

160 age groups. One-headed arrows indicate regressions, double-headed arrows indicate correlations.

161 LC, locus coeruleus; SN, substantia nigra–ventral tegmental area; fse, Fast Spin Echo; mt, Magnetization Transfer (MT+); nomt, Proton Density (MT–).

162

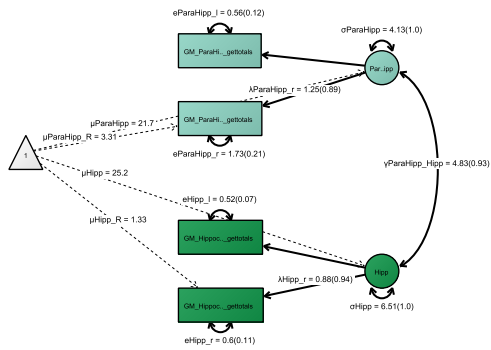

163

164 **Figure S5. Model 1.1.3.**

165 Pictorial rendition of a confirmatory factor analysis including regional factors for hippocampal and parahippocampal volume for older adults.

166 Rectangles and circles indicate manifest (observed) and latent variables, respectively. The constant is depicted by a triangle. (Co)Variances ( $\gamma$ ,  $\sigma$ ) and loadings

167 ( $\lambda$ ) in brackets indicate standardized estimates. One-headed arrows indicate regressions, double-headed arrows indicate correlations.

168 Hipp, hippocampus; Parahipp, parahippocampal cortex.

169



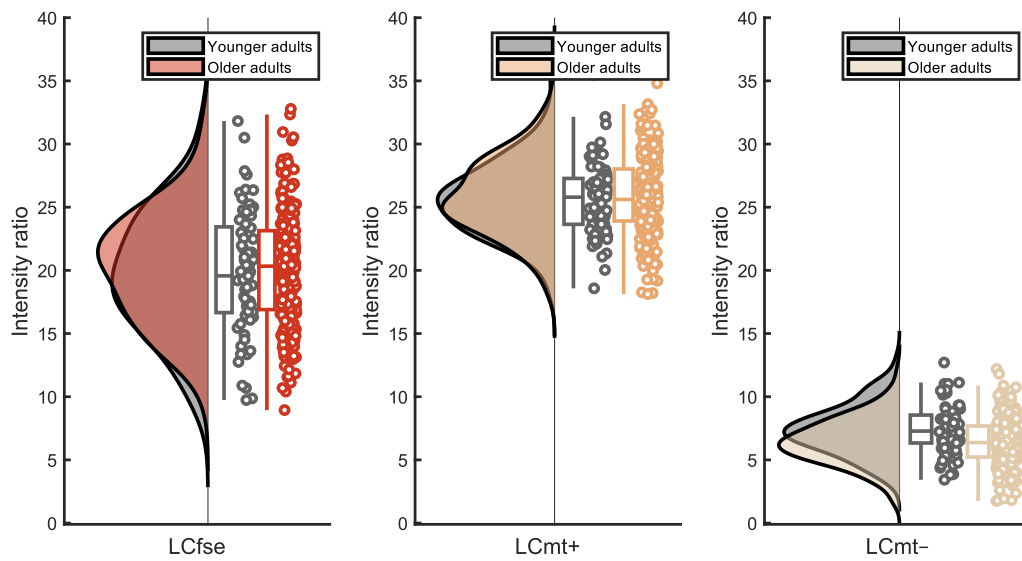

170

171 **Figure S6.** Cross-sectional age differences in modality-specific LC factors.

172 Visualized data are based on the statistical model 1.1.1.

173 Raincloud plots based on [9]. LC, locus coeruleus; fse, Fast Spin Echo; mt, Magnetization Transfer (MT+); nomt,

174 Proton Density (MT-). N = 320 biologically independent participants.

175 Box plots are defined by the following values:

176 lower and upper bounds of the box, quartiles (0.25 (Q1); and 0.75 (Q3));

177 center of the box, quartile 0.5 (Q2);

178 lower whisker ( $Q1 - 1.5 * \text{interquartile range}$ ); upper whisker ( $(Q3 + 1.5 * \text{interquartile range})$ )

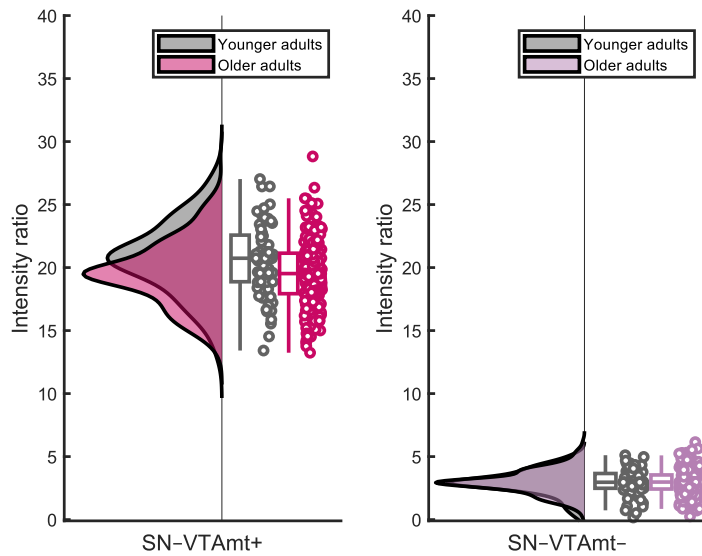

179

180 **Figure S7.** Cross-sectional age differences in modality-specific SN-VTA factors.

181 Visualized data are based on the statistical model 1.1.1.

182 Raincloud plots based on [9]. SN-VTA, substantia nigra-ventral tegmental area; fse, Fast Spin Echo; mt,  
 183 Magnetization Transfer (MT+); nomt, Proton Density (MT-). N = 320 biologically independent participants.

184 Box plots are defined by the following values:

185 lower and upper bounds of the box, quartiles (0.25 (Q1); and 0.75 (Q3));

186 center of the box, quartile 0.5 (Q2);

187 lower whisker ( $Q1 - 1.5 * \text{interquartile range}$ ); upper whisker ( $(Q3 + 1.5 * \text{interquartile range})$ )

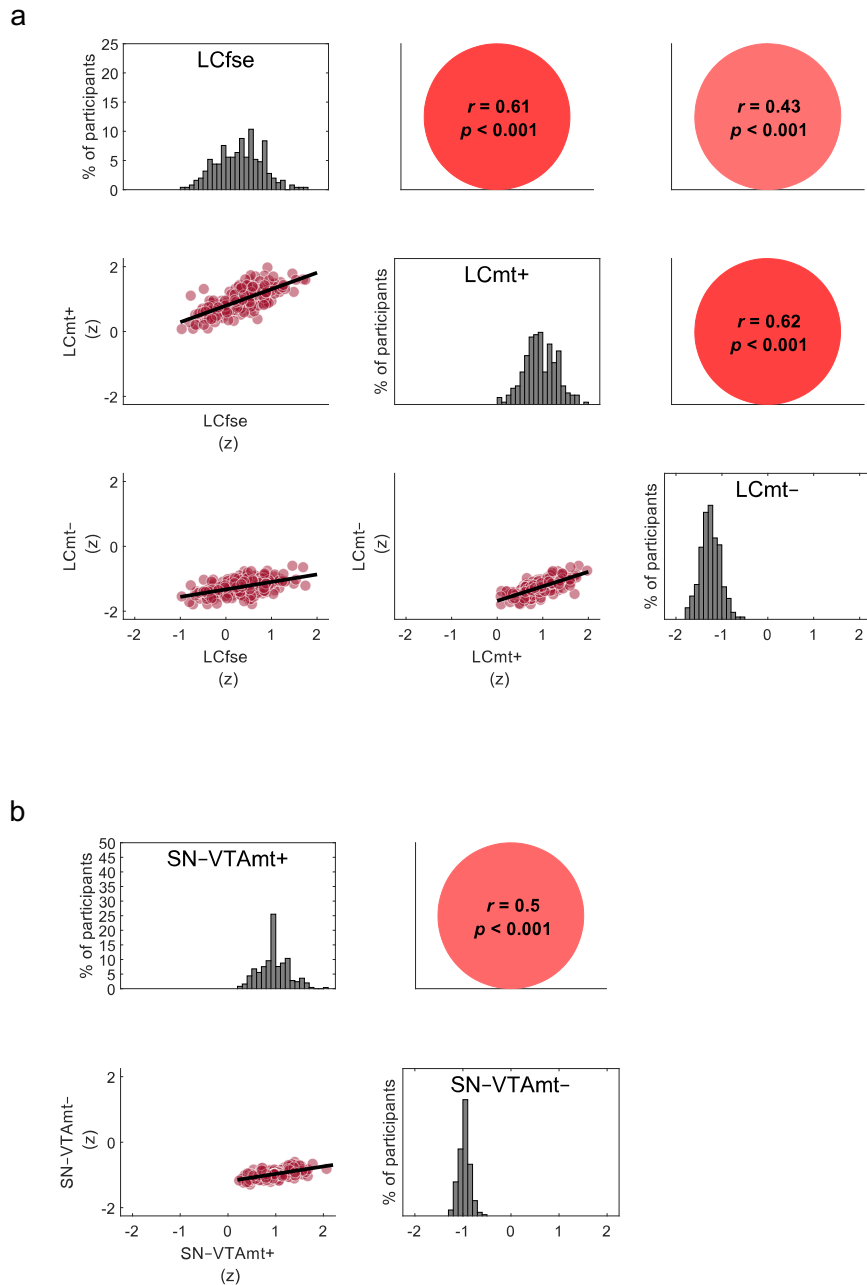

188

189 **Figure S8.** LC and SN–VTA intensities are correlated across imaging modalities (in older adults).

190 Visualized data are based on model 1.1.1. Note, the diagonal shows intensity, standardized across all sequences, to  
 191 facilitate comparing intensity distributions. Imaging sequences included a Fast Spin Echo (FSE) sequence, and a  
 192 Magnetization Transfer sequence, acquired once with a dedicated magnetic saturation pulse (MT+) and once  
 193 without, yielding a proton density image (MT–). LC, locus coeruleus; SN–VTA, substantia nigra–ventral tegmental  
 194 area. N = 251 biologically independent participants. Statistics are based on two-sided likelihood-ratio tests without  
 195 additional adjustment for multiple comparisons. For full test statistics, see Table S3.

196 Cross-sectional cognitive models:

197 **Table S5.** Model fit and invariance for cross-sectional cognitive models

| Model number | Model name             | Age group | Time point | Invariance                 | $\chi^2$ | <i>df</i> | <i>p</i> | RMSEA | CFI   |
|--------------|------------------------|-----------|------------|----------------------------|----------|-----------|----------|-------|-------|
| 1.2.1        | WM, EM, and Gf factors | YA, OA    | 2          | Strong (across age groups) | 104.934  | 78        | 0.023    | 0.047 | 0.966 |

198 *Note:* WM, working memory; EM, episodic memory; Gf, fluid intelligence; YA, younger adults; OA, older adults;  
199 YA, OA, multi-group model including both age groups; RMSEA, root mean square error of approximation; CFI,  
200 comparative fit index. We provide  $\chi^2$  tests for assessing exact model fit and additional approximate fit indexes.

201

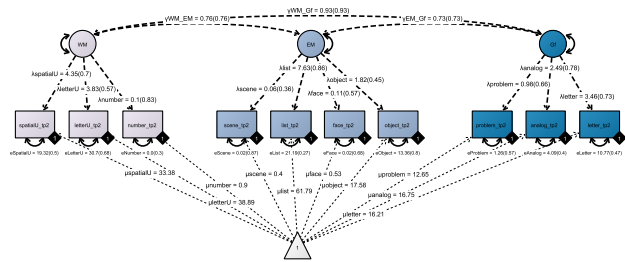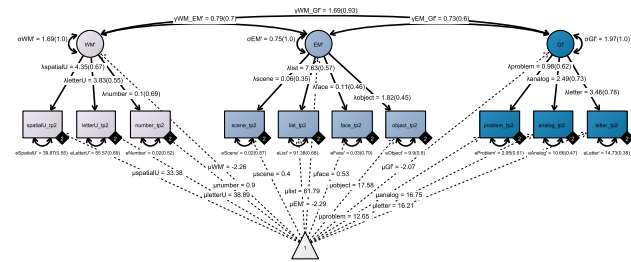

202

203 **Figure S9. Model 1.2.1.**

204 Pictorial rendition of a confirmatory factor analysis including cognitive factors for working memory, episodic memory, and fluid intelligence for younger and  
 205 older adults.

206 Rectangles and circles indicate manifest (observed) and latent variables, respectively. The constant is depicted by a triangle. Black diamonds on manifest  
 207 variables indicate the age group. The younger adult submodel is represented by dashed lines (◆1), and the older adults submodel is represented by solid lines

208 (◆2). (Co)Variances ( $\gamma$ ,  $\sigma$ ) and loadings ( $\lambda$ ) in brackets indicate standardized estimates. Parameters that have the same name are constrained to be equal across  
 209 age groups. One-headed arrows indicate regressions, double-headed arrows indicate correlations.

210 WM, working memory; EM, episodic memory; Gf, fluid intelligence.

211

212 Cross-sectional neuro–cognitive models:

213 **Table S6.** Model fit and invariance for cross-sectional neuro–cognitive models

| Model number | Model name                                                                         | Age group | Time point | Invariance                                               | $\chi^2$ | <i>df</i> | <i>p</i> | RMSEA | CFI   |
|--------------|------------------------------------------------------------------------------------|-----------|------------|----------------------------------------------------------|----------|-----------|----------|-------|-------|
| 1.3.1        | Covariances or regressions <sup>1</sup> between: LC, SN–VTA and WM, EM, Gf factors | YA, OA    | 2          | – (invariance tested for cognitive and neural submodels) | 463.293  | 354       | < 0.001  | 0.044 | 0.934 |
| 1.3.2        | Covariances or regressions between: MTL, LC, SN–VTA and WM, EM, Gf factors         | OA        | 2          | – (single-group, cross-sectional model)                  | 364.132  | 230       | < 0.001  | 0.048 | 0.944 |

214 *Note:* LC, locus coeruleus; SN–VTA, substantia nigra–ventral tegmental area; MTL, medial temporal lobe; WM, working memory; EM, episodic memory; Gf, fluid intelligence; YA, younger adults; OA, older adults; YA, OA, multi-group model including both age groups; RMSEA, root mean square error of approximation; CFI, comparative fit index

218 <sup>1</sup>The models using latent covariances and regressions are statistically equivalent. Thus, we provide the invariance and fit for them together.

220 We provide  $\chi^2$  tests for assessing exact model fit and additional approximate fit indexes..

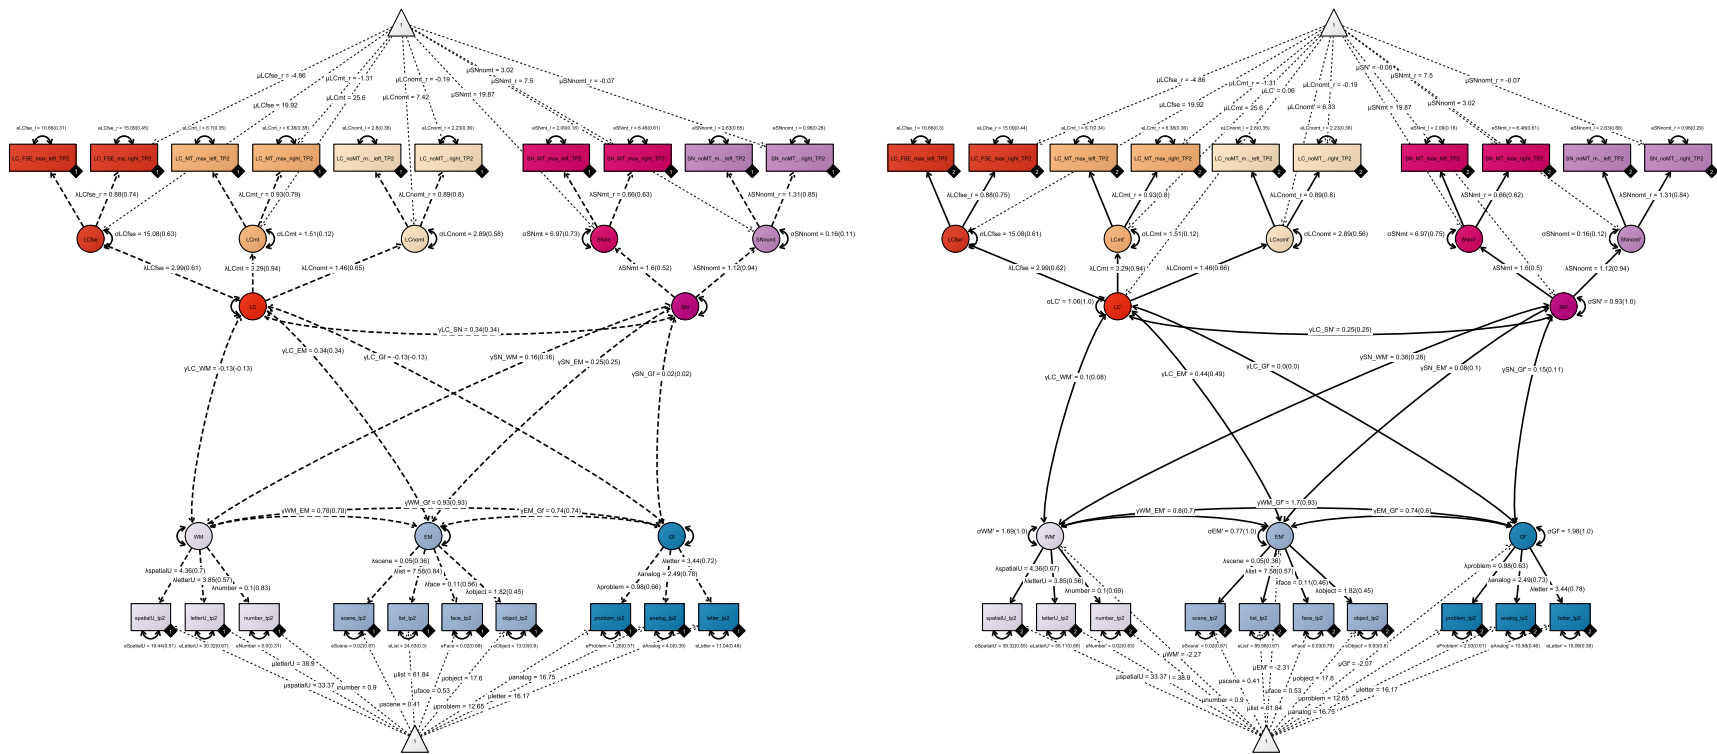

221

222 **Figure S10. Model 1.3.1. (a)**

223 Pictorial rendition of a structural equation model probing the association (correlation) between LC and SN–VTA integrity and cognitive factors for working  
 224 memory, episodic memory, and fluid intelligence in younger and older adults.

225 Rectangles and circles indicate manifest (observed) and latent variables, respectively. The constant is depicted by a triangle. Black diamonds on manifest  
 226 variables indicate the age group. The younger adult submodel is represented by dashed lines (♦1), and the older adults submodel is represented by solid lines  
 227 (♦2). (Co)Variances ( $\gamma$ ,  $\sigma$ ) and loadings ( $\lambda$ ) in brackets indicate standardized estimates. Parameters that have the same name are constrained to be equal across  
 228 age groups. One-headed arrows indicate regressions, double-headed arrows indicate correlations.

229 LC, locus coeruleus; SN, substantia nigra–ventral tegmental area; fse, Fast Spin Echo; mt, Magnetization Transfer (MT+); nomt, Proton Density (MT–); WM,  
 230 working memory; EM, episodic memory; Gf, fluid intelligence.

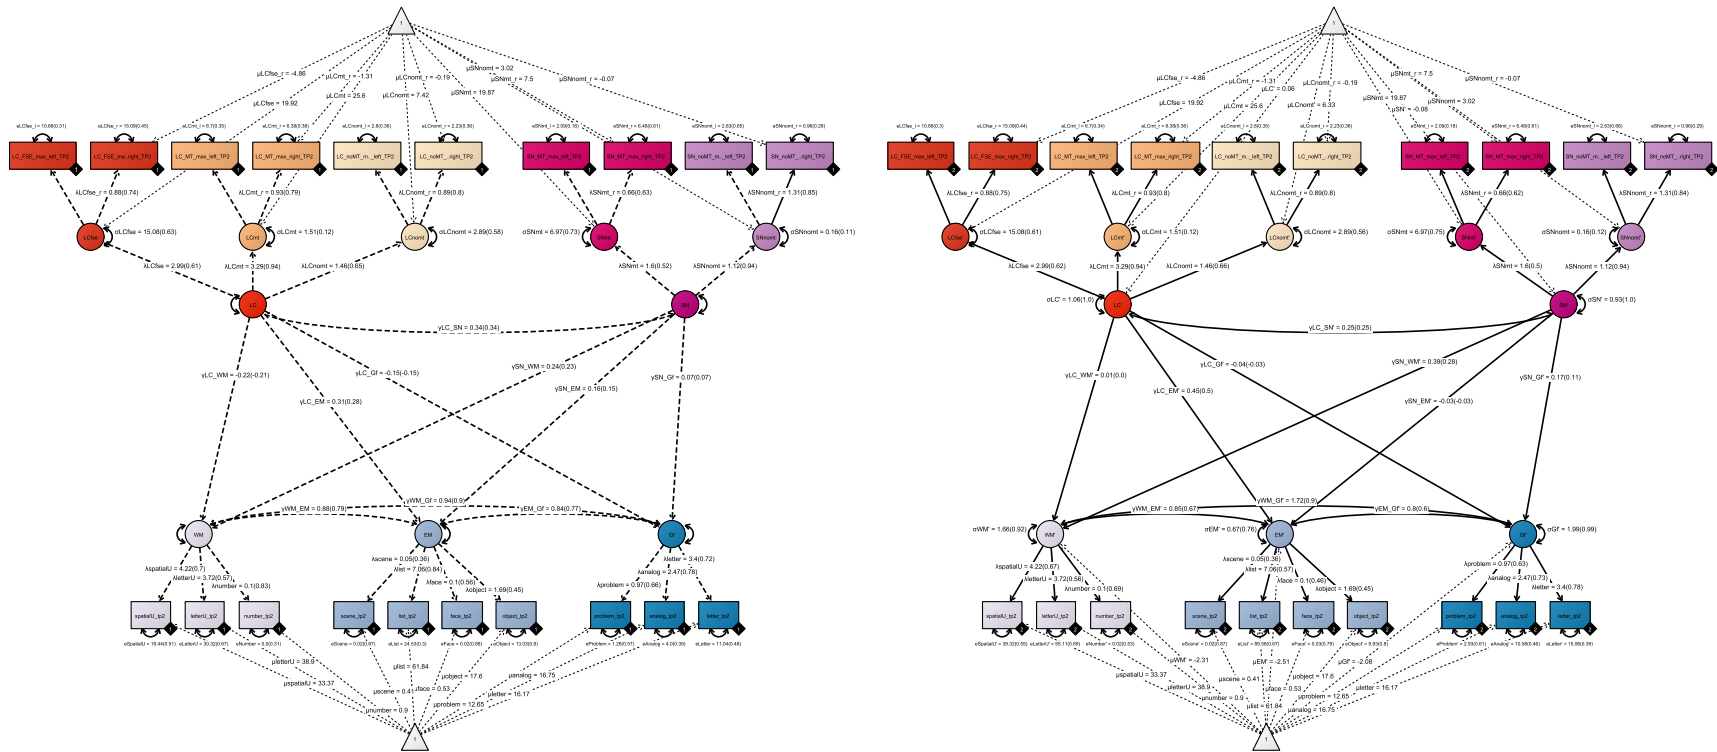

231

232 **Figure S11. Model 1.3.1. (b)**

233 Pictorial rendition of a structural equation model probing unique associations (multiple regression) between LC and SN–VTA integrity and cognitive factors for  
 234 working memory, episodic memory, and fluid intelligence in younger and older adults.

235 Rectangles and circles indicate manifest (observed) and latent variables, respectively. The constant is depicted by a triangle. Black diamonds on manifest  
 236 variables indicate the age group. The younger adult submodel is represented by dashed lines (♦1), and the older adults submodel is represented by solid lines

237 (♦2). (Co)Variances ( $\gamma$ ,  $\sigma$ ) and loadings ( $\lambda$ ) in brackets indicate standardized estimates. Parameters that have the same name are constrained to be equal across

238 age groups. One-headed arrows indicate regressions, double-headed arrows indicate correlations.

239 LC, locus coeruleus; SN, substantia nigra–ventral tegmental area; fse, Fast Spin Echo; mt, Magnetization Transfer (MT+); nomt, Proton Density (MT–); WM,

240 working memory; EM, episodic memory; Gf, fluid intelligence.



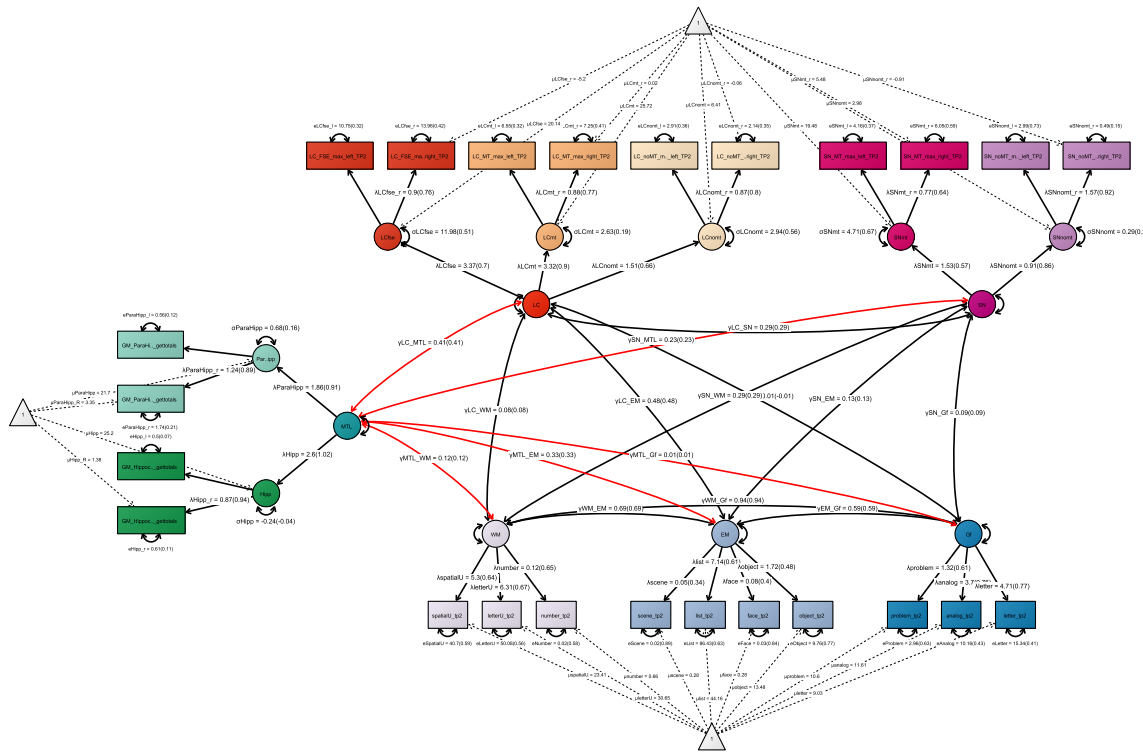

241

242 **Figure S12. Model 1.3.2. (a)**

243 Pictorial rendition of a structural equation model probing the association (correlation) between LC and SN–VTA integrity, medial temporal lobe volume and  
 244 cognitive factors for working memory, episodic memory, and fluid intelligence in older adults.

245 Rectangles and circles indicate manifest (observed) and latent variables, respectively. The constant is depicted by a triangle. (Co)Variances ( $\gamma$ ,  $\sigma$ ) and loadings  
 246 ( $\lambda$ ) in brackets indicate standardized estimates. One-headed arrows indicate regressions, double-headed arrows indicate correlations.

247 LC, locus coeruleus; SN, substantia nigra–ventral tegmental area; fse, Fast Spin Echo; mt, Magnetization Transfer (MT+); nomt, Proton Density (MT–); Hipp,  
 248 hippocampus; Parahipp, parahippocampal cortex; WM, working memory; EM, episodic memory; Gf, fluid intelligence.

249

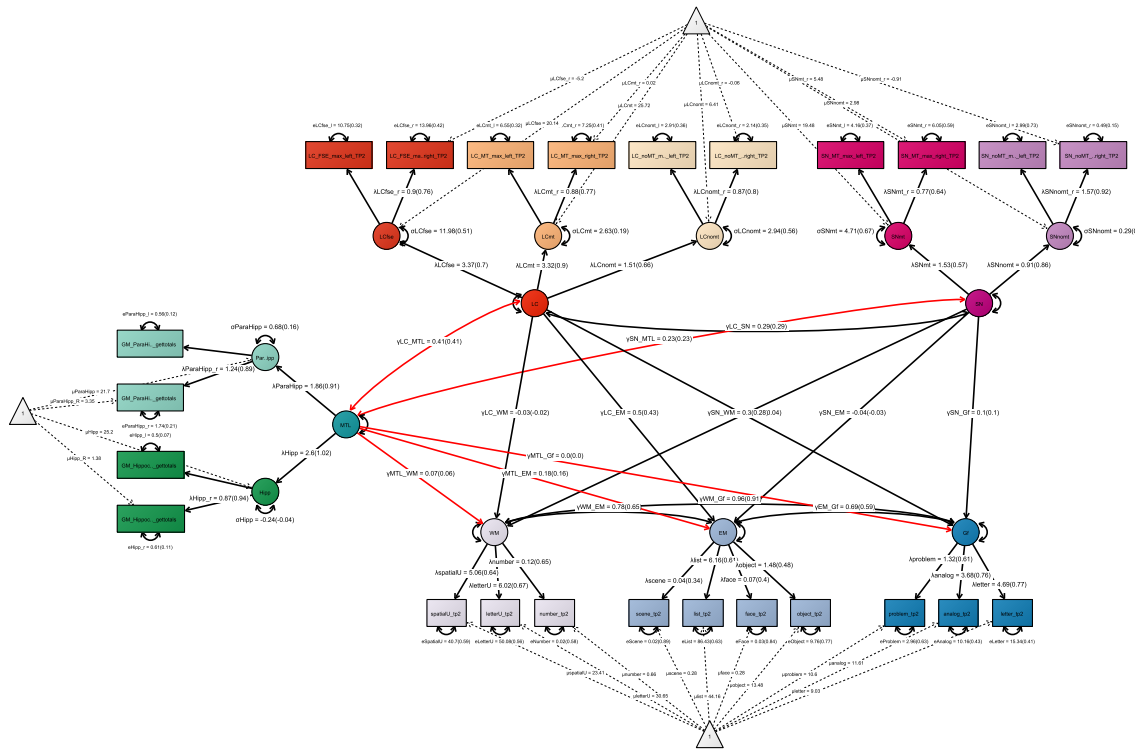

250 **Figure S13. Model 1.3.2. (b)**

251 Pictorial rendition of a structural equation model probing unique associations (multiple regression) between LC and SN–VTA integrity, medial temporal lobe  
 252 volume and cognitive factors for working memory, episodic memory, and fluid intelligence in older adults.

253 Rectangles and circles indicate manifest (observed) and latent variables, respectively. The constant is depicted by a triangle. (Co)Variances ( $\gamma$ ,  $\sigma$ ) and loadings  
 254 ( $\lambda$ ) in brackets indicate standardized estimates. One-headed arrows indicate regressions, double-headed arrows indicate correlations.

255 LC, locus coeruleus; SN, substantia nigra–ventral tegmental area; fse, Fast Spin Echo; mt, Magnetization Transfer (MT+); nomt, Proton Density (MT–); Hipp,  
 256 hippocampus; Parahipp, parahippocampal cortex; WM, working memory; EM, episodic memory; Gf, fluid intelligence.

257 Cross-sectional neuro–cognitive model with mean intensity ratios  
 258 Control analyses using mean intensity ratios largely recapitulate our main findings. That is, we fit model  
 259 1.32 b using mean intensity ratios instead of peak intensity ratios for each catecholaminergic nuclei  
 260 (model fit: CFI = 0.939; RMSEA = 0.054. Heywood case for  $\sigma$ Hipp and  $\sigma$ SNnomt). In this control  
 261 analysis, we again find an (A) interrelation of intensity ratios across MRI modalities; (B) positive  
 262 coupling of multimodal locus coeruleus and substantia nigra–ventral tegmental area factors; (C)  
 263 association of neuromodulatory integrity factors and medial-temporal lobe volumes; (D) association of  
 264 locus coeruleus integrity and episodic memory performance. However, numerical comparisons of the  
 265 magnitude of brain–cognition associations across analysis approaches (peak vs mean intensity) suggests  
 266 that the peak intensity metric better isolates behaviorally-relevant hyperintensities within the search  
 267 spaces. Due to the Heywood cases, the mean intensity model should be interpreted with caution. We  
 268 provide statistical comparisons of the model parameters below.  
 269

270 **Table S7.** Comparison of parameter estimates of cross-sectional neuro-cognitive models fit with peak and mean  
 271 intensity ratio data

| Path            | Standardized estimate |             | Test for difference of coefficients |                |          |
|-----------------|-----------------------|-------------|-------------------------------------|----------------|----------|
|                 | Mean ratios           | Peak ratios | <i>df</i>                           | $\Delta\chi^2$ | <i>p</i> |
| $\gamma$ LC_SN  | 0.43                  | 0.29        | 1                                   | 2.03           | 0.154    |
| $\gamma$ LC_MTL | 0.42                  | 0.41        | 1                                   | 0.01           | 0.920    |
| $\gamma$ SN_MTL | 0.34                  | 0.23        | 1                                   | 1.28           | 0.258    |
| $\gamma$ LC_EM  | 0.22                  | 0.43        | 1                                   | 3.46           | 0.063    |
| $\gamma$ SN_WM  | −0.03                 | 0.28        | 1                                   | 6.93           | 0.009    |

272 *Note:* Statistics are based on two-sided likelihood-ratio tests without additional adjustment for multiple comparisons.

273 Longitudinal neural models:

274 **Table S8.** Model fit and invariance for longitudinal neural models

| Model number | Model name                                               | Age group | Time point | Invariance                                   | $\chi^2$ | <i>df</i> | <i>p</i> | RMSEA              | CFI   |
|--------------|----------------------------------------------------------|-----------|------------|----------------------------------------------|----------|-----------|----------|--------------------|-------|
| 2.1.1        | Covariance of modality-specific LC factors over time     | YA–OA     | 1, 2       | Strong (across time points)                  | 53.468   | 25        | 0.001    | 0.06               | 0.97  |
| 2.1.2        | Covariance of multimodal LC factors over time            | YA–OA     | 1, 2       | Weak <sup>1</sup> (across time points)       | 23.427   | 14        | 0.0537   | 0.046              | 0.987 |
| 2.1.3        | Covariance of modality-specific LC change factors        | OA        | 1, 2       | – (single-group, latent-change score models) | 1.288    | 2         | 0.525    | ~ 0                | ~ 1   |
| 2.1.4        | Multimodal LC change factor                              | OA        | 1, 2       | – (single-group, latent-change score model)  | 1.288    | 1         | 0.256    | 0.034              | 0.998 |
| 2.1.5        | Covariance of modality-specific SN–VTA factors over time | YA–OA     | 1, 2       | Strict (across time points)                  | 25.167   | 18        | 0.120    | 0.035              | 0.982 |
| 2.1.6        | Covariance of multimodal SN–VTA factors over time        | YA–OA     | 1, 2       | Strict (across time points)                  | 36.589   | 23        | 0.036    | 0.043              | 0.966 |
| 2.1.7        | Covariance of modality-specific SN–VTA change factors    | OA        | 1, 2       | – (single-group, latent-change score models) | 4.866    | 2         | 0.088    | 0.076              | 0.96  |
| 2.1.8        | Multimodal SN–VTA change factor                          | OA        | 1, 2       | – (single-group, latent-change score model)  | 4.866    | 1         | 0.027    | 0.124 <sup>2</sup> | 0.947 |

275 *Note:* LC, locus coeruleus; SN–VTA, substantia nigra–ventral tegmental area; YA, younger adults; OA, older  
 276 adults; YA–OA, single group model including both age groups; RMSEA, root mean square error of approximation;  
 277 CFI, comparative fit index.

278 <sup>1</sup> Model 2.1.2 does not show invariant modality-specific LC intercepts over time. Thus, strong invariance constraints  
 279 do not hold. However, as we analyze covariances over time (not means), this does not influence any of the reported  
 280 findings.

281 <sup>2</sup> Model 2.1.7 exceeds conventional recommendations for RMSEA. Note, however, that the unified neuro–cognitive  
 282 model (2.3.2) on which we base our inferences shows good fit [8,10].

283 We provide  $\chi^2$  tests for assessing exact model fit and additional approximate fit indexes.



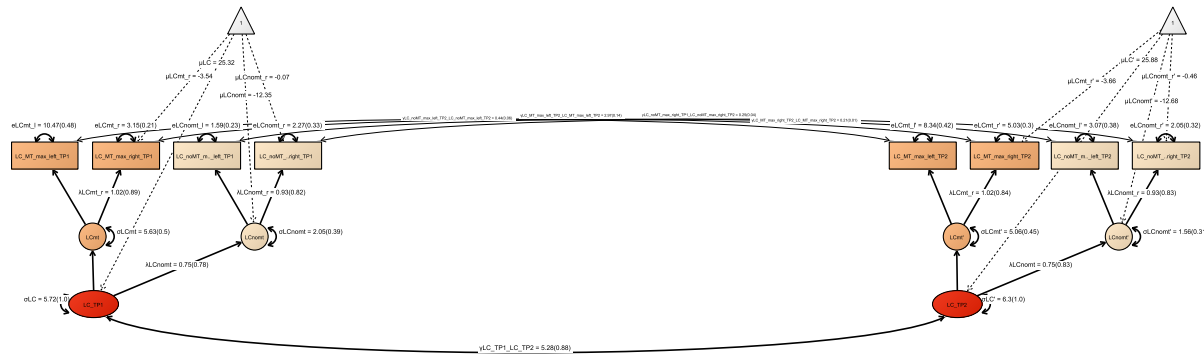

290

291 **Figure S15.** Model 2.1.2.

292 Pictorial rendition of a confirmatory factor analysis including multimodal LC factors for time point 1 and 2 across younger and older adults.

293 Rectangles and circles indicate manifest (observed) and latent variables, respectively. The constant is depicted by a triangle. (Co)Variances ( $\gamma$ ,  $\sigma$ ) and loadings

294 ( $\lambda$ ) in brackets indicate standardized estimates. One-headed arrows indicate regressions, double-headed arrows indicate correlations.

295 LC, locus coeruleus; SN, substantia nigra–ventral tegmental area; fse, Fast Spin Echo; mt, Magnetization Transfer (MT+); nomt, Proton Density (MT–); TP, time

296 point.

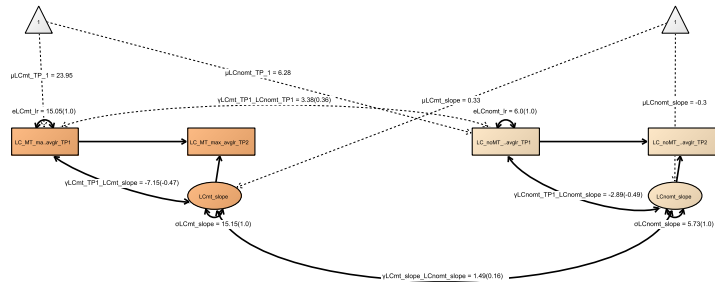

297

298 **Figure S16.** Model 2.1.3.

299 Pictorial rendition of modality-specific LC latent change score models including data of time point 1 and 2 of older adults.

300 Rectangles and circles indicate manifest (observed) and latent variables, respectively. The constant is depicted by a triangle. (Co)Variances ( $\gamma$ ,  $\sigma$ ) and loadings

301 ( $\lambda$ ) in brackets indicate standardized estimates. One-headed arrows indicate regressions, double-headed arrows indicate correlations.

302 LC, locus coeruleus; SN, substantia nigra–ventral tegmental area; fse, Fast Spin Echo; mt, Magnetization Transfer (MT+); nomt, Proton Density (MT–); TP, time

303 point.

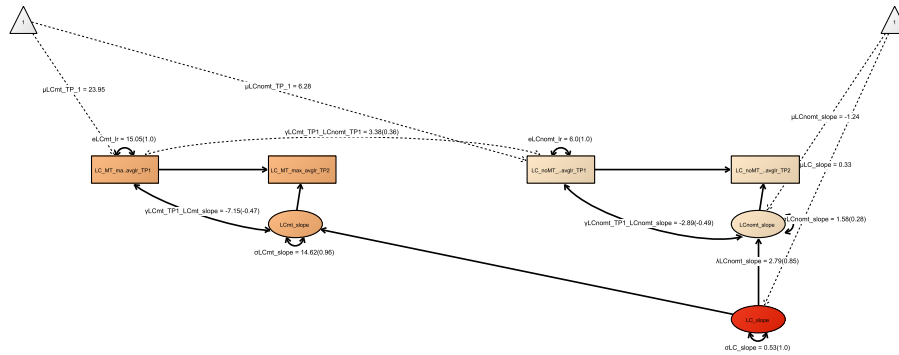

304

305 **Figure S17.** Model 2.1.4.

306 Pictorial rendition of a confirmatory factor analysis aggregating across modality-specific LC latent change score models (time point 1→2) in older adults.

307 Rectangles and circles indicate manifest (observed) and latent variables, respectively. The constant is depicted by a triangle. (Co)Variances ( $\gamma$ ,  $\sigma$ ) and loadings ( $\lambda$ ) in brackets indicate standardized estimates. One-headed arrows indicate regressions, double-headed arrows indicate correlations.

308 LC, locus coeruleus; SN, substantia nigra–ventral tegmental area; fse, Fast Spin Echo; mt, Magnetization Transfer (MT+); nomt, Proton Density (MT–); TP, time  
 309 point.  
 310



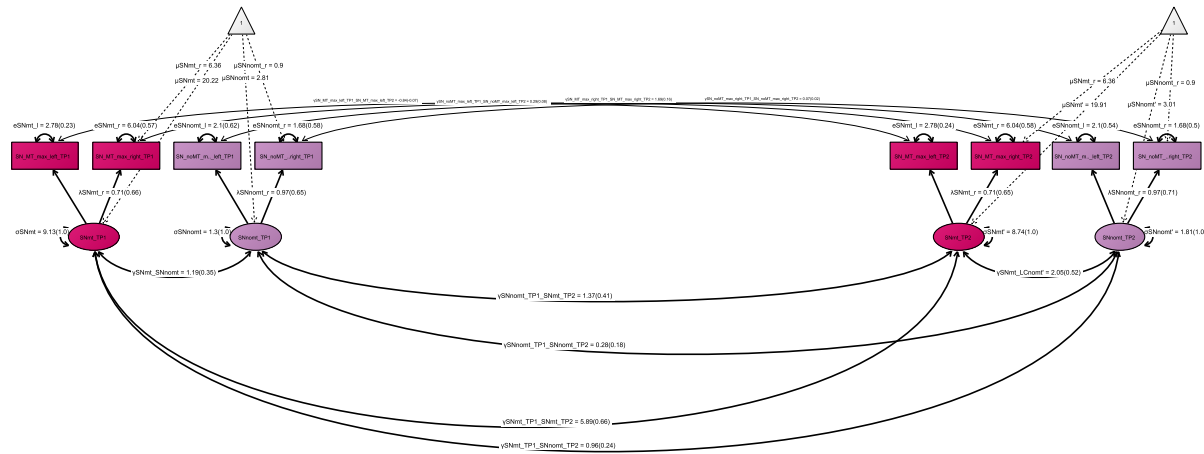

311

312 **Figure S18.** Model 2.1.5.

313 Pictorial rendition of a confirmatory factor analysis including modality-specific SN–VTA factors for time point 1 and 2 across younger and older adults.

314 Rectangles and circles indicate manifest (observed) and latent variables, respectively. The constant is depicted by a triangle. (Co)Variances ( $\gamma$ ,  $\sigma$ ) and loadings ( $\lambda$ ) in brackets indicate standardized estimates. One-headed arrows indicate regressions, double-headed arrows indicate correlations.

316 LC, locus coeruleus; SN, substantia nigra–ventral tegmental area; fse, Fast Spin Echo; mt, Magnetization Transfer (MT+); nomt, Proton Density (MT–); TP, time  
317 point.

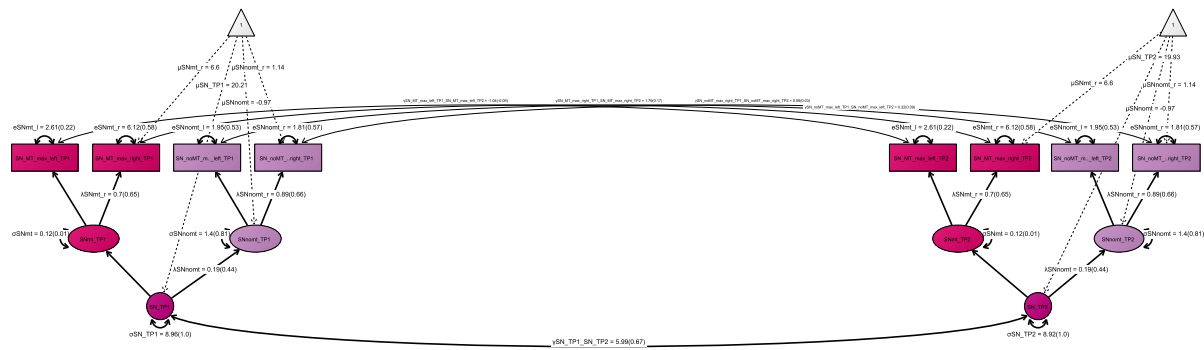

318

319 **Figure S19.** Model 2.1.6.

320 Pictorial rendition of a confirmatory factor analysis including multimodal SN–VTA factors for time point 1 and 2 across younger and older adults.

321 Rectangles and circles indicate manifest (observed) and latent variables, respectively. The constant is depicted by a triangle. (Co)Variances ( $\gamma$ ,  $\sigma$ ) and loadings

322 ( $\lambda$ ) in brackets indicate standardized estimates. One-headed arrows indicate regressions, double-headed arrows indicate correlations.

323 LC, locus coeruleus; SN, substantia nigra–ventral tegmental area; fse, Fast Spin Echo; mt, Magnetization Transfer (MT+); nomt, Proton Density (MT–); TP, time

324 point.

325

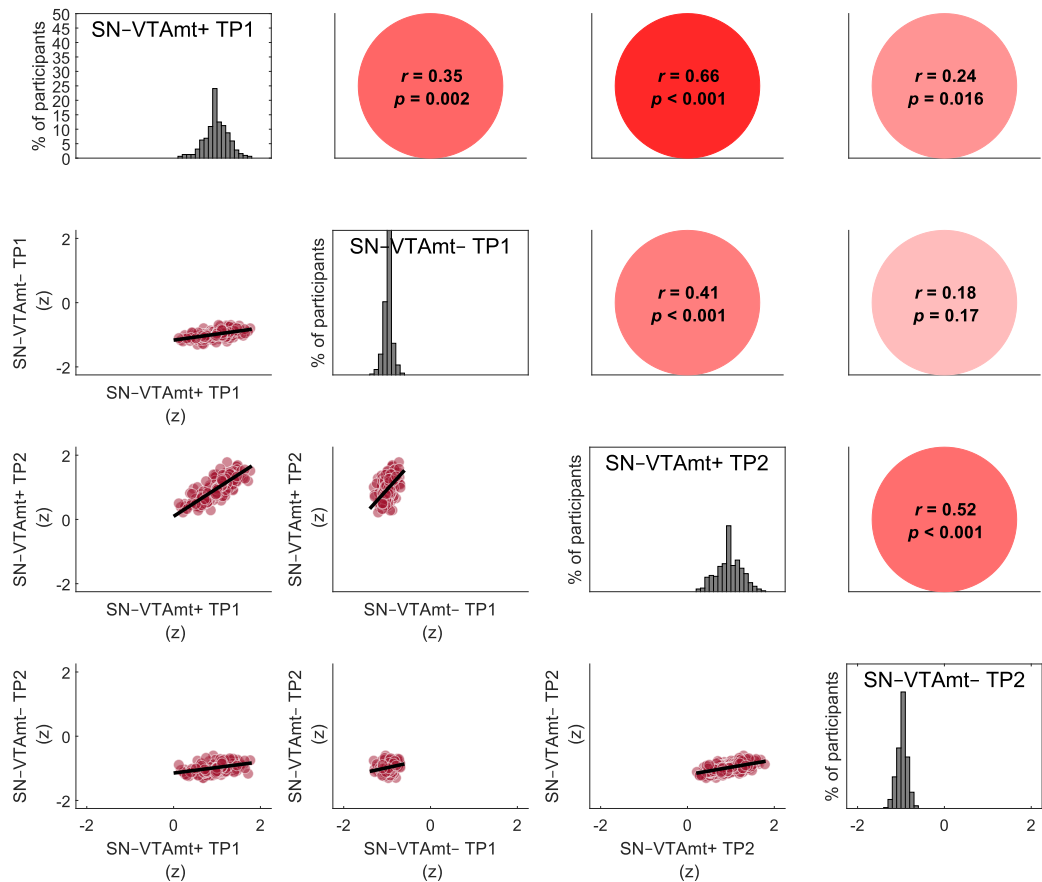

326

327 **Figure S20.** SN-VTA intensities are correlated across imaging modalities—a marker for their agreement—and time points—a marker for their stability (across  
 328 younger and older adults).

329 Visualized data are based on the statistical model 2.1.5. For the same analyses using LC area data, see Figure 3. Note, the diagonal shows SN-VTA intensity,  
 330 standardized across all sequences and time points, to facilitate comparing intensity distributions. Imaging sequences included a Magnetization Transfer sequence,  
 331 acquired once with a dedicated magnetic saturation pulse (MT+) and once without, resulting in a proton density image (MT-). LC, locus coeruleus; SN-VTA,

332 substantia nigra–ventral tegmental area; TP, time point. N = 320 biologically independent participants. Statistics are based on two-sided likelihood-ratio tests  
333 without additional adjustment for multiple comparisons. For full test statistics, see Table S3.

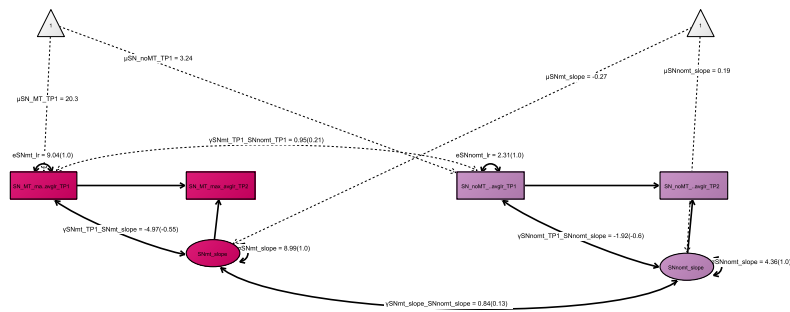

334

335 **Figure S21.** Model 2.1.7.

336 Pictorial rendition of modality-specific SN–VTA latent change scores models including data of time point 1 and 2 of older adults.

337 Rectangles and circles indicate manifest (observed) and latent variables, respectively. The constant is depicted by a triangle. (Co)Variances ( $\gamma$ ,  $\sigma$ ) and loadings

338 ( $\lambda$ ) in brackets indicate standardized estimates. One-headed arrows indicate regressions, double-headed arrows indicate correlations. LC, locus coeruleus; SN,

339 substantia nigra–ventral tegmental area; fse, Fast Spin Echo; mt, Magnetization Transfer (MT+); nomt, Proton Density (MT–); TP, time point.

340

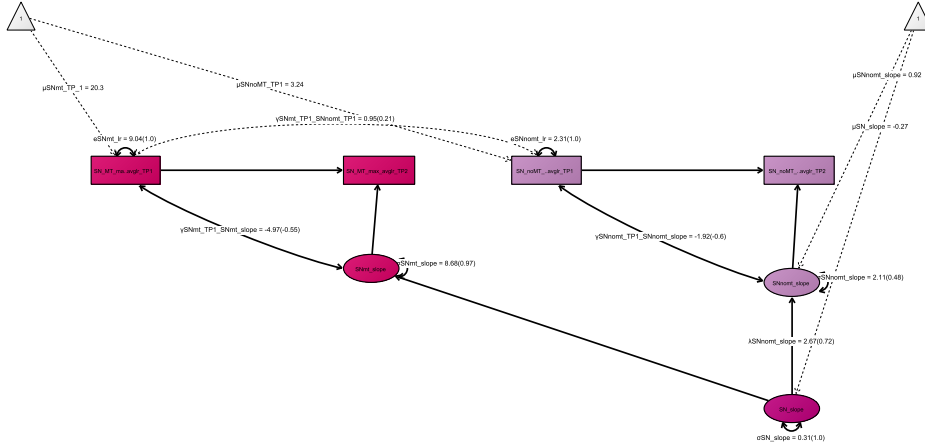

341

342 **Figure S22.** Model 2.1.8.

343 Pictorial rendition of a confirmatory factor analysis aggregating across modality-specific SN–VTA latent change score models (time point 1→2) in older adults.  
 344 Rectangles and circles indicate manifest (observed) and latent variables, respectively. The constant is depicted by a triangle. (Co)Variances ( $\gamma$ ,  $\sigma$ ) and loadings  
 345 ( $\lambda$ ) in brackets indicate standardized estimates. One-headed arrows indicate regressions, double-headed arrows indicate correlations.  
 346 LC, locus coeruleus; SN, substantia nigra–ventral tegmental area; fse, Fast Spin Echo; mt, Magnetization Transfer (MT+); nomt, Proton Density (MT–); TP, time  
 347 point.  
 348

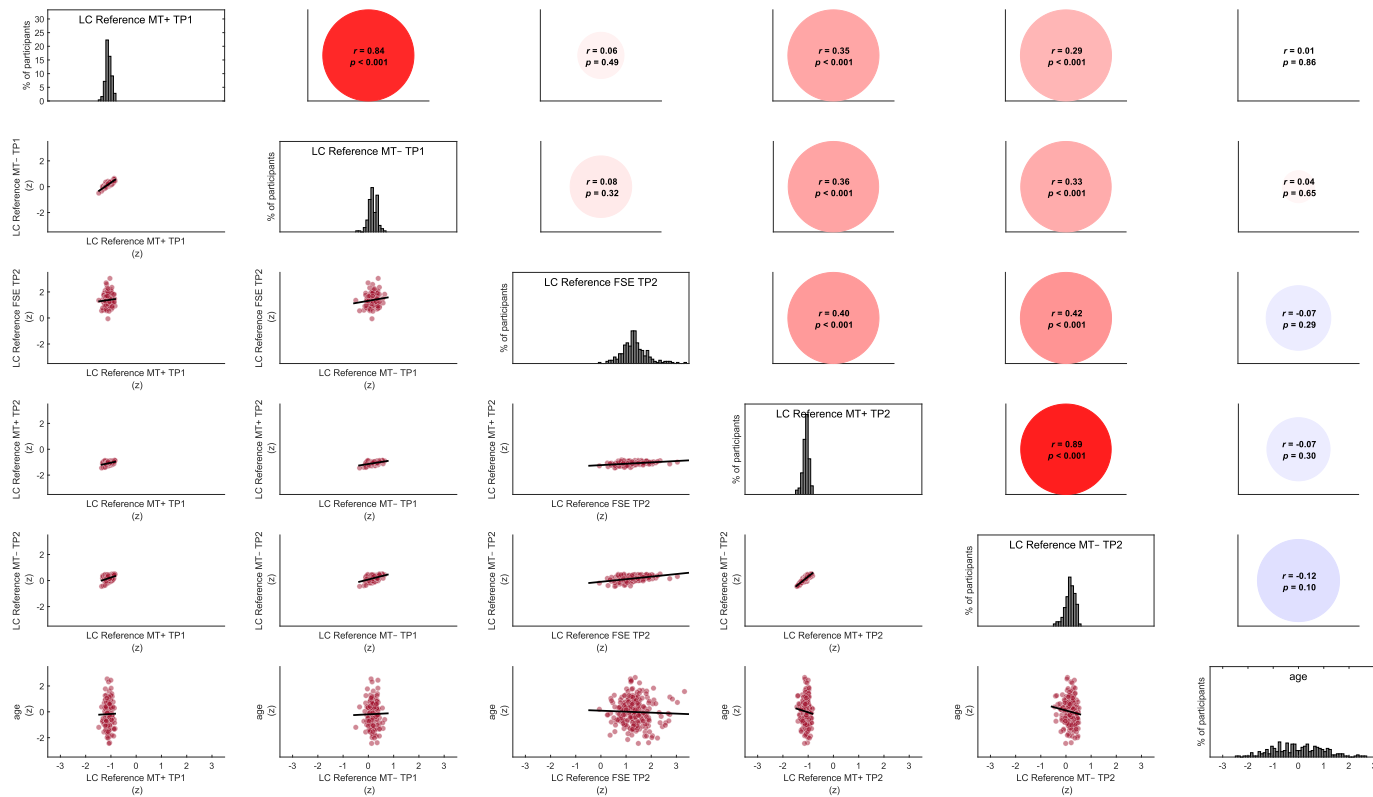

349

350 **Figure S23.** Pontine reference intensities across imaging modalities and time points, and their association with chronological age (in older adults).

351 Visualized data are averaged across hemispheres. For the same analyses using LC data, see Figure 3. Note, the diagonal shows intensity, standardized across all  
 352 sequences and time points, to facilitate comparing intensity distributions (age was standardized separately). Imaging sequences included a Fast Spin Echo  
 353 sequence and a Magnetization Transfer sequence, acquired once with a dedicated magnetic saturation pulse (MT+) and once without, resulting in a proton  
 354 density image (MT-). LC, locus coeruleus; SN-VTA, substantia nigra-ventral tegmental area; TP, time point. N = 251 biologically independent participants.  
 355 Statistics are based on two-sided Spearman correlation tests without additional adjustment for multiple comparisons.  
 356

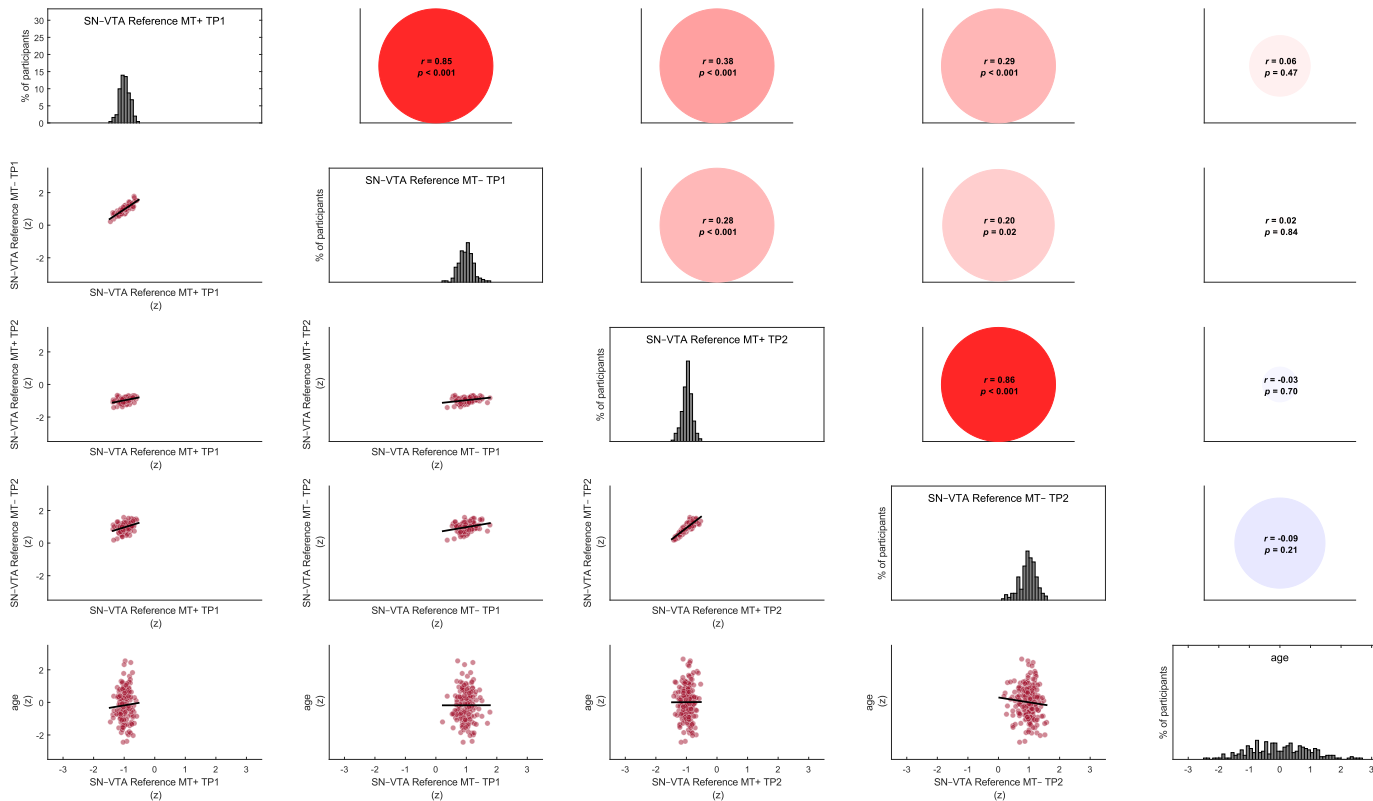

357

358 **Figure S24.** Crus cerebri reference intensities across imaging modalities and time points, and their association with chronological age (in older adults).

359 Visualized data are averaged across hemispheres. For the same analyses using SN-VTA data, see Figure S20. Note, the diagonal shows intensity, standardized  
 360 across all sequences and time points, to facilitate comparing intensity distributions (age was standardized separately). Imaging sequences included a  
 361 Magnetization Transfer sequence, acquired once with a dedicated magnetic saturation pulse (MT+) and once without, resulting in a proton density image (MT-).  
 362 LC, locus coeruleus; SN-VTA, substantia nigra-ventral tegmental area; TP, time point. N = 251 biologically independent participants. Statistics are based on  
 363 two-sided Spearman correlation tests without additional adjustment for multiple comparisons.



364 Longitudinal cognitive models:

365 **Table S9.** Model fit and invariance for longitudinal cognitive models

| Model number | Model name                                    | Age group | Time point | Invariance                                      | $\chi^2$ | <i>df</i> | <i>p</i> | RMSEA | CFI   |
|--------------|-----------------------------------------------|-----------|------------|-------------------------------------------------|----------|-----------|----------|-------|-------|
| 2.2.1        | Covariance of task-specific WM change factors | OA        | 1, 2, 3    | –<br>(single-group, latent-change score models) | 5.005    | 6         | 0.543    | ~ 0   | ~ 1   |
| 2.2.2        | Covariance of task-specific EM change factors | OA        | 1, 2, 3    | –<br>(single-group, latent-change score models) | 18.502   | 14        | 0.185    | 0.036 | 0.988 |

366 *Note:* WM, working memory; EM, episodic memory; YA, younger adults; OA, older adults; RMSEA, root mean  
367 square error of approximation; CFI, comparative fit index. We provide  $\chi^2$  tests for assessing exact model fit and  
368 additional approximate fit indexes.

369

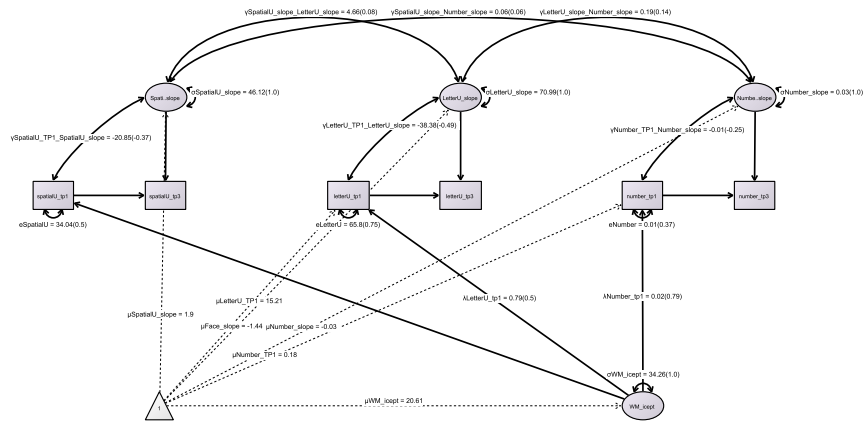

370

371 **Figure S25.** Model 2.2.1.

372 Pictorial rendition of task-specific working memory latent change scores models including data of time point 1 and 3 of older adults.

373 Rectangles and circles indicate manifest (observed) and latent variables, respectively. The constant is depicted by a triangle. (Co)Variances ( $\gamma$ ,  $\sigma$ ) and loadings

374 ( $\lambda$ ) in brackets indicate standardized estimates. One-headed arrows indicate regressions, double-headed arrows indicate correlations. WM, working memory; TP,

375 time point.

376

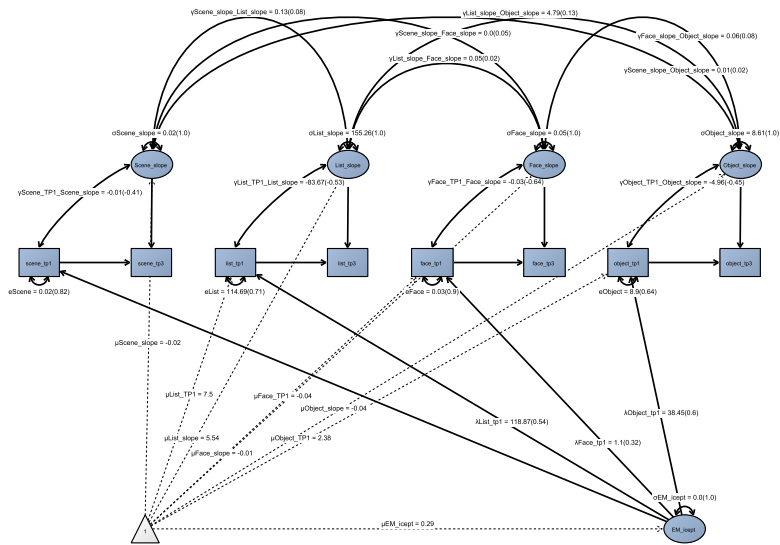

377

378 **Figure S26.** Model 2.2.2.

379 Pictorial rendition of task-specific episodic memory latent change scores models including data of time point 1 and 3 of older adults.

380 Rectangles and circles indicate manifest (observed) and latent variables, respectively. The constant is depicted by a triangle. (Co)Variances ( $\gamma$ ,  $\sigma$ ) and loadings

381 ( $\lambda$ ) in brackets indicate standardized estimates. One-headed arrows indicate regressions, double-headed arrows indicate correlations. EM, episodic memory; TP,

382 time point.

383

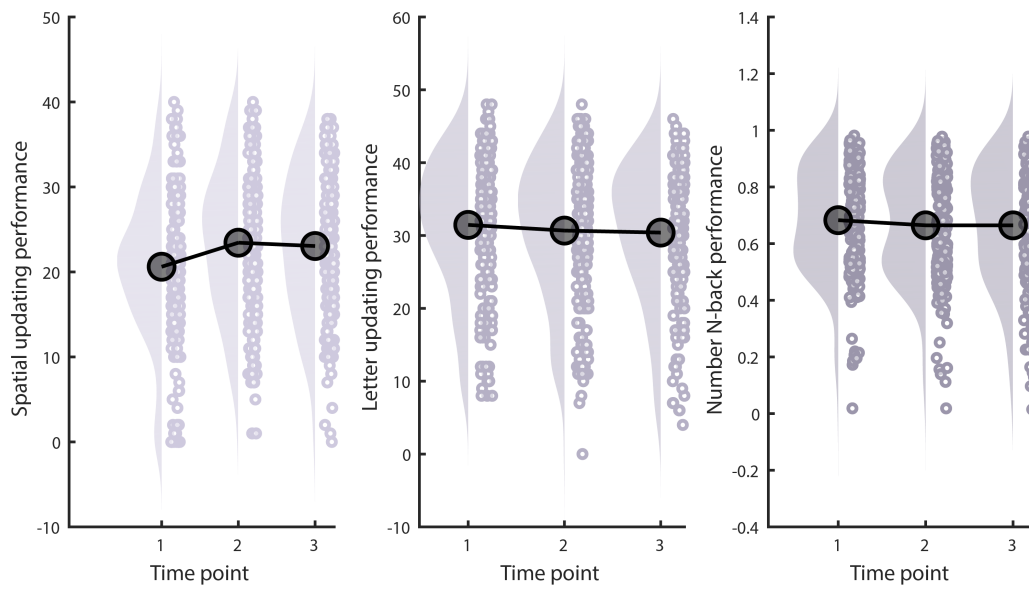

384

385 **Figure S27.** Older adults' working memory performance for time points 1–3 for each indicator task.

386 Raincloud plots based on [9]. N = 251 biologically independent participants.

387

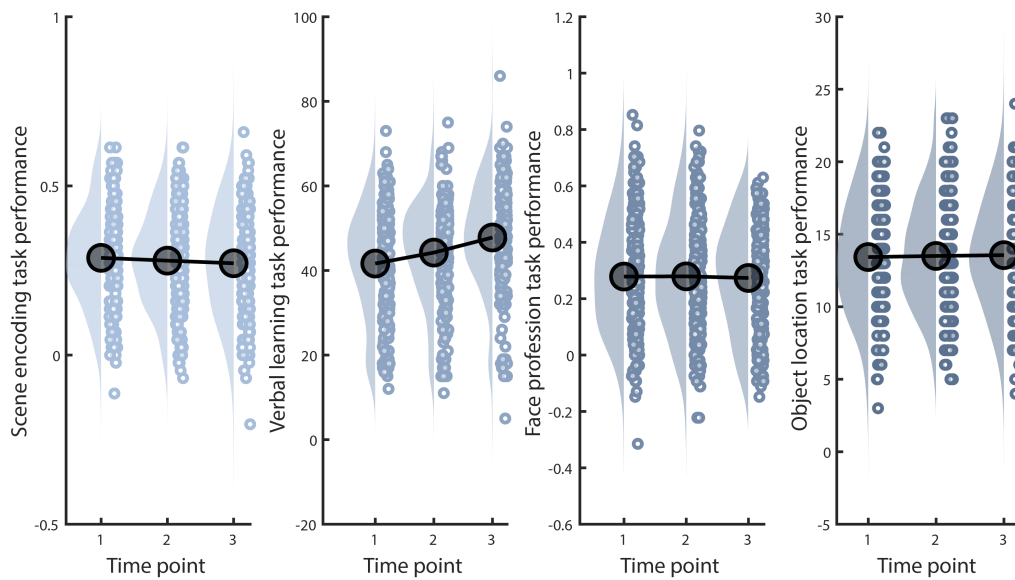

388

389 **Figure S28.** Older adults' episodic memory performance for time points 1–3 for each indicator task.

390 Raincloud plots based on [9]. N = 251 biologically independent participants.

391

392

393 Longitudinal neuro–cognitive models:

394 **Table S10.** Model fit and invariance for longitudinal neuro–cognitive models

| Model number | Model name                                                 | Age group | Time point | Invariance                                     | $\chi^2$ | <i>df</i> | <i>p</i> | RMSEA | CFI   |
|--------------|------------------------------------------------------------|-----------|------------|------------------------------------------------|----------|-----------|----------|-------|-------|
| 2.3.1        | Prediction of EM factor by multimodal LC change factor     | OA        | 1, 2, 3    | –<br>(single-group, latent-change score model) | 34.799   | 25        | 0.092    | 0.04  | 0.962 |
| 2.3.2        | Prediction of WM factor by multimodal SN–VTA change factor | OA        | 1, 2, 3    | –<br>(single-group, latent-change score model) | 20.997   | 18        | 0.28     | 0.026 | 0.984 |

395 *Note:* LC, locus coeruleus; SN–VTA, substantia nigra–ventral tegmental area; WM, working memory; EM, episodic  
 396 memory; OA, older adults; RMSEA, root mean square error of approximation; CFI, comparative fit index. We  
 397 provide  $\chi^2$  tests for assessing exact model fit and additional approximate fit indexes.

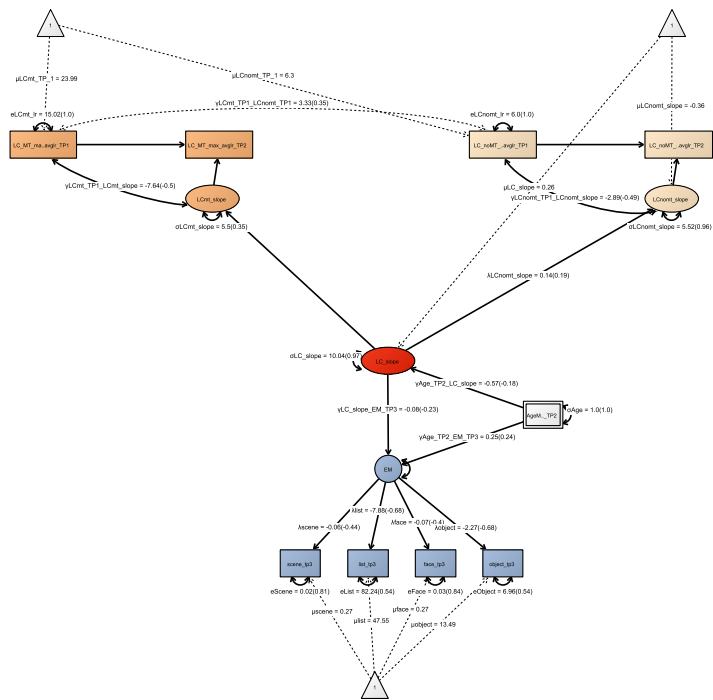

398

399 **Figure S29.** Model 2.3.1.

400 Pictorial rendition of structural equation model predicting episodic memory performance (time point 3) by multi-modal LC change scores (time point 1→2) in  
 401 older adults.

402 Rectangles and circles indicate manifest (observed) and latent variables, respectively. The constant is depicted by a triangle. (Co)Variances ( $\gamma$ ,  $\sigma$ ) and loadings  
 403 ( $\lambda$ ) in brackets indicate standardized estimates. One-headed arrows indicate regressions, double-headed arrows indicate correlations.

404 LC, locus coeruleus; SN, substantia nigra–ventral tegmental area; fse, Fast Spin Echo; mt, Magnetization Transfer (MT+); nomt, Proton Density (MT–)

405 EM, episodic memory; TP, time point.

406

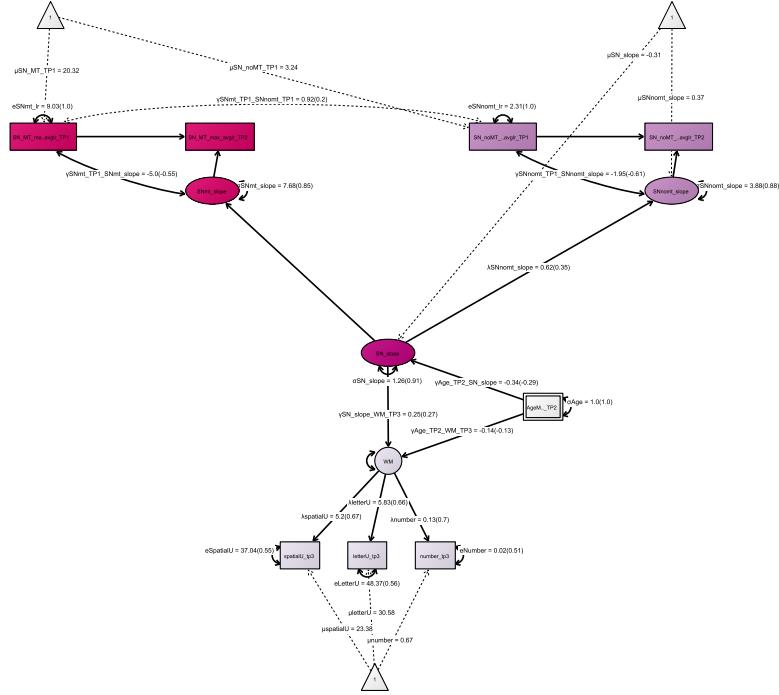

407

408 **Figure S30.** Model 2.3.2.

409 Pictorial rendition of structural equation model predicting working memory performance (time point 3) by multi-modal SN-VTA change scores (time point  
 410 1→2) in older adults.

411 Rectangles and circles indicate manifest (observed) and latent variables, respectively. The constant is depicted by a triangle. (Co)Variances ( $\gamma$ ,  $\sigma$ ) and loadings  
 412 ( $\lambda$ ) in brackets indicate standardized estimates. One-headed arrows indicate regressions, double-headed arrows indicate correlations.

413 LC, locus coeruleus; SN, substantia nigra-ventral tegmental area; fse, Fast Spin Echo; mt, Magnetization Transfer (MT+); nomt, Proton Density (MT-); EM,  
 414 episodic memory; TP, time point.

415

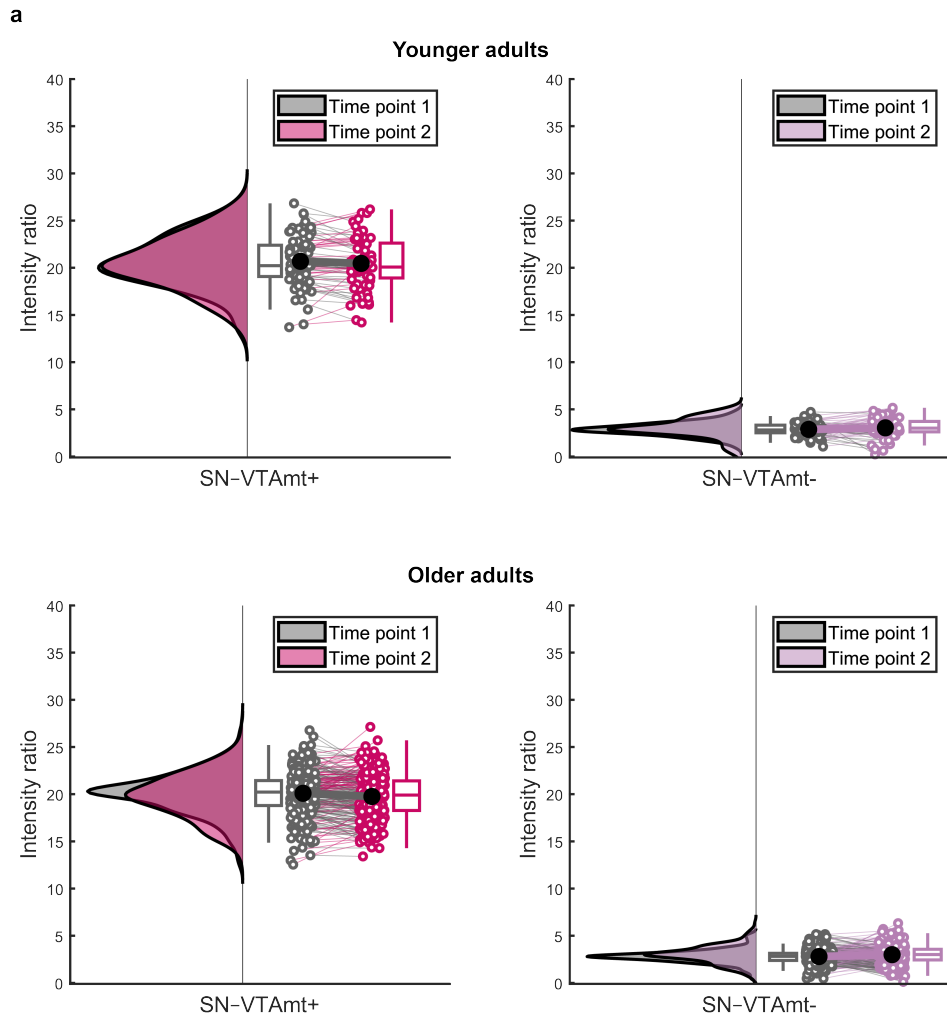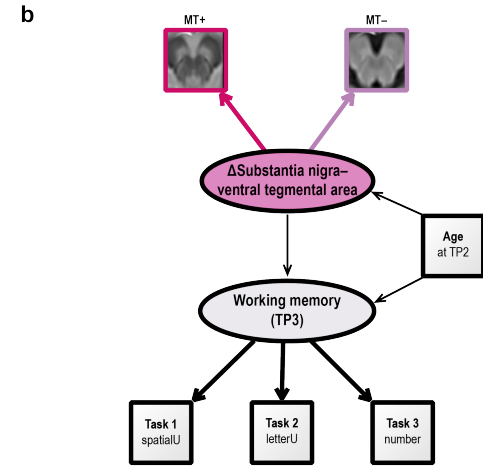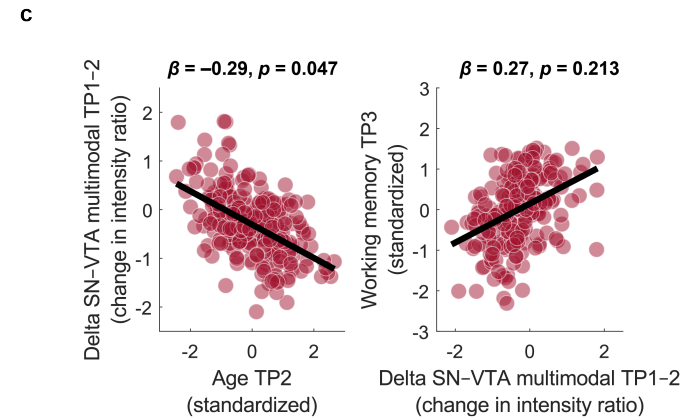



417 **Figure S31.** Longitudinal changes in SN–VTA intensity ratios and their association with age and future memory performance.

418 **a.** Numerically, older adults show more negative average change in SN–VTA intensity across time points as compared to younger adults. MRI sequences include  
419 a Magnetization Transfer sequence, acquired once with a dedicated magnetic saturation pulse (MT+) and once without, yielding a proton density image (MT–).  
420 For the Fast Spin Echo-sequence, only cross-sectional data are available. **b.** Schematic depiction of the structural equation model probing the association of  
421 longitudinal change in multimodal SN–VTA integrity with future working memory performance, accounting for chronological age. For the full model, see Figure  
422 S24. **c.** Scatter plots showing (1) more negative SN–VTA change in older adults of higher age and (2) the association of future memory performance and SN–  
423 VTA change (controlling for chronological age). For comparable analyses using LC and episodic memory data, see Figures S23 and 7. Raincloud plots based on  
424 [9]. LC, locus coeruleus; SN–VTA, substantia nigra–ventral tegmental area. N = 320 biologically independent participants. Statistics are based on two-sided  
425 likelihood-ratio tests without additional adjustment for multiple comparisons. For full test statistics, see Table S3.  
426 Box plots are defined by the following values:  
427 lower and upper bounds of the box, quartiles (0.25 (Q1); and 0.75 (Q3));  
428 center of the box, quartile 0.5 (Q2);  
429 lower whisker ( $Q1 - 1.5 * \text{interquartile range}$ ); upper whisker ( $(Q3 + 1.5 * \text{interquartile range})$ )  
430

431 Cross-sectional and longitudinal neuro–cognitive models with additional covariates:  
 432 After establishing relations between catecholaminergic integrity and late-life memory performance, we  
 433 tested whether these remained significant when accounting for potential confounds. Specifically, we  
 434 included age and education as standardized covariates in our cross-sectional and longitudinal models (cf.  
 435 models 1.3.2b, 2.3.1 and 2.3.2) and specified regression paths between these covariates and all neural and  
 436 cognitive factors.  
 437

438 **Table S11.** Model fit and invariance for neuro–cognitive models with additional covariates

| Model number       | Model name                                                                                             | Age group | Time point | Invariance                                  | $\chi^2$ | $df$ | $p$     | RMSEA | CFI   |
|--------------------|--------------------------------------------------------------------------------------------------------|-----------|------------|---------------------------------------------|----------|------|---------|-------|-------|
| 1.3.2 <sup>1</sup> | Regressions between: MTL, LC, SN–VTA and WM, EM, Gf factors; including age and education as covariates | OA        | 2          | – (single-group, cross-sectional model)     | 424.121  | 269  | < 0.001 | 0.048 | 0.938 |
| 2.3.1              | Prediction of EM factor by multimodal LC change factor; including age and education as covariates      | OA        | 1, 2, 3    | – (single-group, latent-change score model) | 45.056   | 33   | 0.079   | 0.038 | 0.954 |
| 2.3.2              | Prediction of WM factor by multimodal SN–VTA change factor; including age and education as covariates  | OA        | 1, 2, 3    | – (single-group, latent-change score model) | 32.103   | 25   | 0.155   | 0.034 | 0.965 |

439 *Note:* LC, locus coeruleus; SN–VTA, substantia nigra–ventral tegmental area; WM, working memory; EM, episodic  
 440 memory; OA, older adults; RMSEA, root mean square error of approximation; CFI, comparative fit index

441 <sup>1</sup> Model shows Heywood case for  $\sigma_{Hipp}$ .

442 We provide  $\chi^2$  tests for assessing exact model fit and additional approximate fit indexes.

443 We obtained qualitatively similar results to those reported in the main text. That is, cross-sectionally LC  
 444 integrity was still associated with episodic memory, whereas SN–VTA integrity was related to working  
 445 memory performance in older adults ( $\beta = 0.44$ ;  $\Delta\chi^2(df = 1) = 4.4$ ;  $p < 0.001$  for older adults' LC;  $\beta = 0.28$ ;  
 446  $\Delta\chi^2(df = 1) = 4.4$ ;  $p = 0.022$  for older adults' SN–VTA). Longitudinally, older adults' LC changes were  
 447 associated with subsequent episodic memory ( $\beta = 0.3$ ;  $\Delta\chi^2(df = 1) = 5.08$ ;  $p = 0.024$  for older adults' LC),  
 448 whereas the association between SN–VTA change and working memory remained non-significant ( $\beta =$   
 449  $0.29$ ;  $\Delta\chi^2(df = 1) = 1.88$ ;  $p = 0.17$  for older adults' SN–VTA).

450  
 451 Finally, to rule out the possibility that unexplored sex effects [11,12] or our treatment of missing values  
 452 [13] could bias our interpretation, we made use of a different analytical framework (behavioral partial

453 least squares correlation [14–16]) to test for latent brain–behavior associations. These control analyses  
454 relied on the same cognitive and neural indicators as our main analyses.  
455 Cross-sectionally, we again found latent associations between the LC and episodic memory ( $r = 0.367$ ;  $p$   
456  $< 0.001$ ) as well as SN–VTA integrity and working memory ( $r = 0.218$ ;  $p = 0.004$ ), which remained  
457 significant when including age, education, and sex as covariates ( $r_{\text{partial}} = 0.256$ ;  $p_{\text{partial}} = 0.001$  for older  
458 adults’ LC;  $r_{\text{partial}} = 0.199$ ;  $p_{\text{partial}} = 0.009$  for older adults’ SN–VTA; for comparable statistical approaches,  
459 see [16–18]). In addition, longitudinal analyses showed a latent association ( $r = 0.345$ ;  $p = 0.036$ )  
460 between episodic memory performance at time point 3 and changes in LC integrity (conceptualized as  
461 difference scores (TP 2–1) for each imaging modality). This association also remained significant when  
462 additionally controlling for age, education, and sex ( $r_{\text{partial}} = 0.325$ ;  $p_{\text{partial}} = 0.003$ ; cf. [17,18]). Taken  
463 together, our main and control analyses converge and indicate robust associations between  
464 catecholaminergic integrity and memory performance that remain significant when controlling for  
465 additional covariates.  
466  
467

468 Spatial variation in longitudinal sampling of LC and SN–VTA intensity

469 To test if the position from which intensity values were sampled influenced change analyses, we re-  
470 extracted peak intensity ratios for MRI sequences that were assessed at time point 1 and 2 (i.e., MT+,  
471 MT–) for each neuromodulatory system, along with their spatial coordinates (x, y, z in MNI space). We  
472 then computed the Euclidian distance between the spatial positions from which we sampled at time point  
473 1 and time point 2, using:

474  
475 
$$\text{distance}_{\text{TP1, TP2}} = \text{sqrt}((\text{TP2}_x - \text{TP1}_x)^2 + (\text{TP2}_y - \text{TP1}_y)^2 + (\text{TP2}_z - \text{TP1}_z)^2)$$
  
476

477 Distance values were then averaged across hemispheres and MRI sequences (MT+, MT–) and compared  
478 across neuromodulatory systems. Importantly, we did not find evidence for a higher spatial deviance for  
479 the SN–VTA as compared to the LC (Wilcoxon signed rank test;  $Z = -0.641$ ,  $p = 0.521$ ; see below). For  
480 the majority of participants, intensity values were extracted from highly comparable locations across time  
481 points (distance  $\leq 3$  mm, which may correspond to one voxel (native resolution:  $1 \times 1 \times 3$  mm).

482 At this point, we would like to emphasize that the distance measure reported here has a different meaning  
483 than distance measures commonly used in functional MRI analyses, such as, frame-wise displacement.  
484 That is, a homogenous hyperintensity distribution within the LC and SN–VTA search spaces could lead  
485 to sampling from different spatial positions over time even without movement (cf. Figure 3 in the main  
486 text for a visualization of the hyperintensity on a sample level; the corresponding MRI templates are  
487 available via [19]). To support this argument, we tested whether sampling from different spatial positions  
488 over time would be related to changes in intensity estimates (as could be assumed for movement in the  
489 scanner). Neither for the LC nor for the SN–VTA we found an association between Euclidian distance  
490 and changes in intensity estimates ( $ps > 0.19$ ; see below).

491

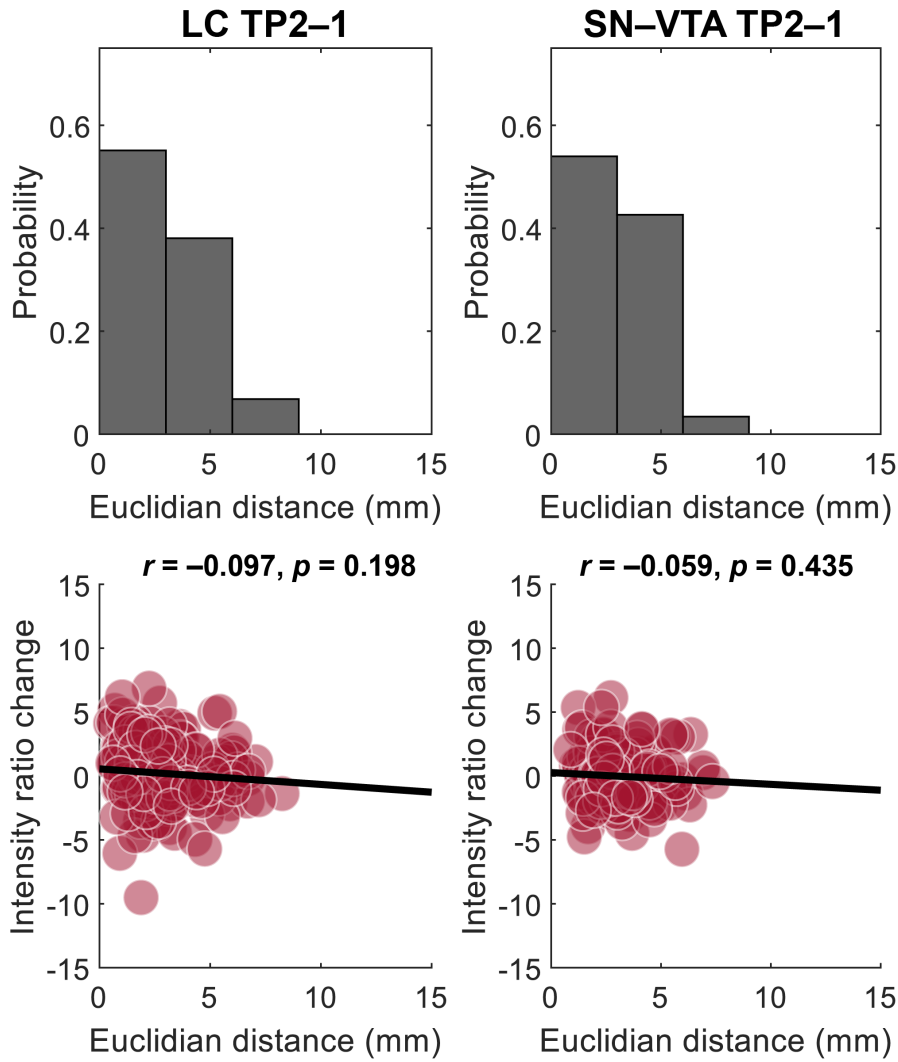

492

493 **Figure S32.** Euclidian distance of spatial positions from which intensity ratios were sampled at time point 1 and 2  
 494 for the LC and SN-VTA.

495 Euclidian distance did not differ significantly across neuromodulatory systems (Wilcoxon signed rank test;  $Z = -$   
 496  $0.641, p = 0.521$ ) and was not associated with intensity changes for either neuromodulatory system ( $p > 0.19$ ).  
 497 Statistics are based on two-sided Spearman correlation tests without additional adjustment for multiple comparisons.

498

499 **Supplementary references:**

- 500 1 Delius, J.A.M. *et al.* (2015) Berlin Aging Studies (BASE and BASE-II). In *Encyclopedia of*  
501 *geropsychology* (Pachana, N. A., ed), pp. 386–395, Springer
- 502 2 Bertram, L. *et al.* (2014) Cohort profile: The Berlin Aging Study II (BASE-II). *Int. J. Epidemiol.*  
503 43, 703–712
- 504 3 Demuth, I. *et al.* (2021) Cohort profile: follow-up of a Berlin Aging Study II (BASE-II) subsample  
505 as part of the GendAge study. *BMJ Open* 11, e045576
- 506 4 Gerstorf, D. *et al.* (2016) The Berlin Aging Study II: An overview [Editorial]. *Gerontology* 62,  
507 311–315
- 508 5 Dahl, M.J. *et al.* (2022) Locus coeruleus integrity is related to tau burden and memory loss in  
509 autosomal-dominant Alzheimer’s disease. *Neurobiol. Aging* 112, 39–54
- 510 6 Kline, R.B. (2016) *Principles and practice of structural equation modeling, 4th ed.*, Guilford  
511 Press.
- 512 7 Hu, L.T. and Bentler, P.M. (1999) Cutoff criteria for fit indexes in covariance structure analysis:  
513 Conventional criteria versus new alternatives. *Struct. Equ. Model.* 6, 1–55
- 514 8 Brown, T.A. (2006) *Confirmatory factor analysis for applied research*, Guilford Press.
- 515 9 Allen, M. *et al.* (2021) Raincloud plots: a multi-platform tool for robust data visualization.  
516 *Wellcome Open Res.* 2021 463 4, 63
- 517 10 Hu, L.T. and Bentler, P.M. (1999) Cutoff criteria for fit indexes in covariance structure analysis:  
518 Conventional criteria versus new alternatives. *Struct. Equ. Model.* 6, 1–55
- 519 11 Bachman, S.L. *et al.* (2020) Locus coeruleus MRI contrast is associated with cortical thickness in  
520 older adults. *Neurobiol. Aging* 100, 72–82
- 521 12 Köhncke, Y. *et al.* (2021) Hippocampal and Parahippocampal Gray Matter Structural Integrity  
522 Assessed by Multimodal Imaging Is Associated with Episodic Memory in Old Age. *Cereb. Cortex*  
523 31, 1464–1477
- 524 13 von Oertzen, T. *et al.* (2015) Structural equation modeling with  $\Omega$ nyx. *Struct. Equ. Model.* 22,  
525 148–161
- 526 14 McIntosh, A.R. and Lobaugh, N.J. (2004) , Partial least squares analysis of neuroimaging data:  
527 Applications and advances. , in *NeuroImage*, 23
- 528 15 Krishnan, A. *et al.* (2011) Partial Least Squares (PLS) methods for neuroimaging: A tutorial and  
529 review. *Neuroimage* 56, 455–475
- 530 16 Dahl, M.J. *et al.* (2022) Locus coeruleus integrity is related to tau burden and memory loss in  
531 autosomal-dominant Alzheimer’s disease. *Neurobiol. Aging* 112, 39–54
- 532 17 Ye, R. *et al.* (2021) Reduced locus coeruleus integrity linked to response inhibition deficits in  
533 parkinsonian disorders. *medRxiv* DOI: 10.1101/2021.10.14.21264996
- 534 18 Guardia, T. *et al.* (2022) The role of the arousal system in age-related differences in cortical  
535 functional network architecture. *Hum. Brain Mapp.* 43, 985–997
- 536 19 Dahl, M.J. *et al.* (2022) The integrity of dopaminergic and noradrenergic brain regions is  
537 associated with different aspects of late-life memory performance. *OSF* DOI:  
538 <https://doi.org/10.17605/OSF.IO/EPH9A>  
539
